# Supplementary material
Source: PubMed Central journal article supplement (PMC5481987)
Supplement: DC162452SupplementaryData.pdf [file DC162452SupplementaryData.pdf]

SUPPLEMENTARY DATA

**Supplementary Table 1.** Partial correlations of maternal fasting metabolites with newborn cord blood metabolites.

| Metabolite              | Afro-Caribbean |       |          | Northern European |       |          | Mexican American |       |          | Thai |       |          | Meta-Analysis |          |       |          |                |
|-------------------------|----------------|-------|----------|-------------------|-------|----------|------------------|-------|----------|------|-------|----------|---------------|----------|-------|----------|----------------|
|                         | N              | Corr  | P        | N                 | Corr  | P        | N                | Corr  | P        | N    | Corr  | P        | Corr          | P        | Q     | Q-test P | I <sup>2</sup> |
| AC C5-DC                | 365            | 0.389 | 2.05e-13 | 391               | 0.429 | 6.05e-18 | 362              | 0.431 | 7.09e-17 | 368  | 0.358 | 8.25e-12 | 0.403         | 1.18e-58 | 1.91  | 6.66e-01 | 0.00           |
| AC C6-DC/C8-OH          | 400            | 0.400 | 4.13e-15 | 400               | 0.474 | 2.04e-22 | 399              | 0.434 | 1.64e-18 | 399  | 0.354 | 2.64e-12 | 0.417         | 5.86e-45 | 4.58  | 4.11e-01 | 34.45          |
| Citrulline              | 400            | 0.366 | 5.00e-13 | 400               | 0.400 | 6.66e-16 | 399              | 0.305 | 2.18e-09 | 400  | 0.291 | 1.02e-08 | 0.341         | 6.77e-33 | 4.05  | 4.32e-01 | 25.97          |
| AC C3                   | 400            | 0.348 | 5.85e-12 | 400               | 0.429 | 2.98e-18 | 399              | 0.358 | 1.03e-12 | 400  | 0.299 | 4.44e-09 | 0.359         | 2.67e-32 | 4.64  | 4.11e-01 | 35.35          |
| Methionine              | 399            | 0.229 | 9.51e-06 | 400               | 0.300 | 2.89e-09 | 398              | 0.282 | 3.06e-08 | 399  | 0.294 | 8.62e-09 | 0.276         | 1.67e-28 | 1.44  | 7.53e-01 | 0.00           |
| AC C5                   | 400            | 0.311 | 7.83e-10 | 400               | 0.313 | 6.60e-10 | 398              | 0.294 | 8.81e-09 | 400  | 0.201 | 7.53e-05 | 0.280         | 3.33e-23 | 3.84  | 4.32e-01 | 21.83          |
| AC C4/Ci4               | 399            | 0.294 | 7.50e-09 | 399               | 0.401 | 6.66e-16 | 399              | 0.431 | 2.12e-18 | 398  | 0.315 | 6.06e-10 | 0.361         | 2.76e-22 | 6.94  | 2.30e-01 | 56.79          |
| Leucine/Isoleucine      | 400            | 0.319 | 3.27e-10 | 399               | 0.242 | 2.43e-06 | 399              | 0.289 | 1.40e-08 | 399  | 0.204 | 6.27e-05 | 0.264         | 2.76e-22 | 3.54  | 4.47e-01 | 15.37          |
| AC C10:1                | 400            | 0.221 | 1.74e-05 | 400               | 0.303 | 2.10e-09 | 399              | 0.263 | 2.32e-07 | 399  | 0.350 | 4.28e-12 | 0.285         | 1.17e-21 | 4.30  | 4.26e-01 | 30.29          |
| AC C8                   | 400            | 0.312 | 7.11e-10 | 399               | 0.247 | 1.65e-06 | 399              | 0.195 | 1.65e-04 | 400  | 0.237 | 3.54e-06 | 0.248         | 1.48e-21 | 3.24  | 4.47e-01 | 7.51           |
| Tyrosine                | 400            | 0.388 | 1.91e-14 | 400               | 0.380 | 1.91e-14 | 397              | 0.261 | 3.12e-07 | 399  | 0.293 | 9.10e-09 | 0.332         | 2.25e-21 | 6.06  | 2.94e-01 | 50.47          |
| Valine                  | 400            | 0.344 | 9.10e-12 | 400               | 0.302 | 2.31e-09 | 398              | 0.437 | 1.39e-18 | 400  | 0.287 | 1.52e-08 | 0.344         | 1.43e-19 | 7.21  | 2.27e-01 | 58.42          |
| AC C2                   | 400            | 0.282 | 3.12e-08 | 399               | 0.213 | 3.65e-05 | 399              | 0.326 | 1.10e-10 | 400  | 0.218 | 1.91e-05 | 0.260         | 4.28e-19 | 4.09  | 4.32e-01 | 26.71          |
| AC C8:1                 | 400            | 0.335 | 3.47e-11 | 400               | 0.324 | 1.45e-10 | 398              | 0.332 | 5.63e-11 | 399  | 0.473 | 1.42e-22 | 0.368         | 5.56e-19 | 8.65  | 1.43e-01 | 65.30          |
| Alanine                 | 400            | 0.221 | 1.73e-05 | 400               | 0.311 | 7.52e-10 | 398              | 0.192 | 1.98e-04 | 400  | 0.229 | 7.21e-06 | 0.239         | 1.83e-18 | 3.56  | 4.47e-01 | 15.81          |
| AC C18:1-DC             | 397            | 0.244 | 2.21e-06 | 394               | 0.225 | 1.36e-05 | 396              | 0.151 | 3.99e-03 | 397  | 0.218 | 2.03e-05 | 0.210         | 1.06e-16 | 2.10  | 6.34e-01 | 0.00           |
| Ornithine               | 399            | 0.145 | 4.41e-03 | 399               | 0.264 | 2.41e-07 | 398              | 0.225 | 1.14e-05 | 400  | 0.227 | 8.90e-06 | 0.216         | 1.54e-16 | 3.24  | 4.47e-01 | 7.44           |
| AC C10:2                | 389            | 0.170 | 1.15e-03 | 396               | 0.181 | 4.57e-04 | 394              | 0.277 | 5.70e-08 | 394  | 0.262 | 3.35e-07 | 0.223         | 9.67e-15 | 3.89  | 4.32e-01 | 22.88          |
| AC C8:1-DC              | 388            | 0.262 | 4.41e-07 | 398               | 0.239 | 3.22e-06 | 391              | 0.286 | 2.45e-08 | 396  | 0.153 | 2.90e-03 | 0.236         | 1.11e-14 | 4.37  | 4.26e-01 | 31.46          |
| AC C10:3                | 400            | 0.351 | 4.32e-12 | 400               | 0.350 | 3.19e-12 | 399              | 0.364 | 4.23e-13 | 399  | 0.529 | 9.51e-29 | 0.401         | 1.96e-14 | 14.22 | 2.03e-02 | 78.91          |
| Proline                 | 400            | 0.354 | 2.98e-12 | 400               | 0.511 | 3.29e-26 | 396              | 0.406 | 2.75e-16 | 399  | 0.609 | 4.64e-40 | 0.476         | 1.13e-11 | 26.58 | 1.95e-04 | 88.71          |
| Serine                  | 399            | 0.153 | 2.82e-03 | 400               | 0.177 | 5.88e-04 | 398              | 0.272 | 8.35e-08 | 400  | 0.268 | 1.54e-07 | 0.218         | 1.76e-11 | 4.97  | 3.76e-01 | 39.63          |
| AC C14:2                | 393            | 0.189 | 3.16e-04 | 400               | 0.132 | 1.14e-02 | 396              | 0.119 | 2.37e-02 | 399  | 0.218 | 1.91e-05 | 0.165         | 1.02e-10 | 2.79  | 5.22e-01 | 0.00           |
| AC C4-OH                | 400            | 0.172 | 9.22e-04 | 393               | 0.190 | 2.71e-04 | 398              | 0.120 | 2.22e-02 | 394  | 0.169 | 1.03e-03 | 0.163         | 1.70e-10 | 1.10  | 8.22e-01 | 0.00           |
| AC C10-OH/C8-DC         | 377            | 0.230 | 1.52e-05 | 392               | 0.191 | 2.57e-04 | 380              | 0.112 | 3.53e-02 | 396  | 0.141 | 6.03e-03 | 0.169         | 3.55e-10 | 3.30  | 4.47e-01 | 8.14           |
| AC C12-OH/C10-DC        | 388            | 0.185 | 4.51e-04 | 395               | 0.133 | 1.11e-02 | 389              | 0.158 | 2.87e-03 | 394  | 0.166 | 1.25e-03 | 0.161         | 3.55e-10 | 0.57  | 9.04e-01 | 0.00           |
| AC C12:1                | 400            | 0.126 | 1.35e-02 | 399               | 0.130 | 1.25e-02 | 398              | 0.151 | 3.99e-03 | 399  | 0.236 | 4.06e-06 | 0.161         | 1.96e-09 | 3.36  | 4.47e-01 | 10.66          |
| AC C18:1                | 400            | 0.150 | 3.23e-03 | 400               | 0.188 | 2.71e-04 | 399              | 0.259 | 3.37e-07 | 399  | 0.315 | 6.06e-10 | 0.229         | 3.99e-09 | 7.19  | 2.27e-01 | 58.27          |
| AC C20-OH/C18-DC        | 380            | 0.251 | 1.95e-06 | 400               | 0.202 | 9.12e-05 | 393              | 0.298 | 7.06e-09 | 392  | 0.127 | 1.41e-02 | 0.220         | 1.01e-08 | 6.85  | 2.30e-01 | 56.21          |
| AC C18:2                | 400            | 0.167 | 1.18e-03 | 400               | 0.232 | 6.09e-06 | 399              | 0.276 | 5.70e-08 | 399  | 0.374 | 9.82e-14 | 0.264         | 1.77e-08 | 10.58 | 7.37e-02 | 71.63          |
| AC C18-OH/C16-DC        | 355            | 0.179 | 1.15e-03 | 398               | 0.138 | 8.08e-03 | 360              | 0.298 | 2.45e-08 | 397  | 0.271 | 1.26e-07 | 0.222         | 2.52e-08 | 7.15  | 2.27e-01 | 57.97          |
| Phenylalanine           | 399            | 0.260 | 4.24e-07 | 396               | 0.247 | 1.65e-06 | 396              | 0.111 | 3.36e-02 | 400  | 0.159 | 1.89e-03 | 0.195         | 1.48e-07 | 6.46  | 2.59e-01 | 53.56          |
| AC C16:1-OH/C14:1-DC    | 392            | 0.176 | 8.15e-04 | 395               | 0.160 | 2.15e-03 | 388              | 0.068 | 1.89e-01 | 394  | 0.199 | 1.02e-04 | 0.151         | 2.28e-07 | 3.93  | 4.32e-01 | 23.36          |
| AC C18                  | 399            | 0.221 | 1.75e-05 | 400               | 0.199 | 1.18e-04 | 399              | 0.426 | 5.19e-18 | 399  | 0.343 | 1.01e-11 | 0.300         | 3.08e-07 | 16.82 | 8.32e-03 | 82.16          |
| Glycine                 | 398            | 0.319 | 3.27e-10 | 400               | 0.300 | 2.89e-09 | 399              | 0.230 | 6.59e-06 | 399  | 0.514 | 4.47e-27 | 0.346         | 9.15e-07 | 24.82 | 3.03e-04 | 87.91          |
| 3-Hydroxybutyrate       | 398            | 0.219 | 2.12e-05 | 398               | 0.089 | 8.97e-02 | 394              | 0.130 | 1.39e-02 | 395  | 0.219 | 1.91e-05 | 0.165         | 1.02e-06 | 5.30  | 3.55e-01 | 43.41          |
| AC C5:1                 | 395            | 0.165 | 1.49e-03 | 392               | 0.468 | 2.00e-21 | 398              | 0.462 | 1.07e-20 | 396  | 0.485 | 1.30e-23 | 0.402         | 1.33e-06 | 35.34 | 5.57e-06 | 91.51          |
| Glycerol                | 397            | 0.122 | 1.70e-02 | 399               | 0.149 | 4.27e-03 | 396              | 0.098 | 6.07e-02 | 398  | 0.099 | 5.25e-02 | 0.117         | 4.23e-06 | 0.69  | 8.92e-01 | 0.00           |
| Glutamine/Glutamic acid | 398            | 0.174 | 8.15e-04 | 397               | 0.070 | 1.95e-01 | 398              | 0.122 | 2.01e-02 | 398  | 0.096 | 6.14e-02 | 0.116         | 5.42e-06 | 2.45  | 5.68e-01 | 0.00           |
| AC C8:1-OH/C6:1-DC      | 400            | 0.158 | 2.09e-03 | 400               | 0.389 | 4.67e-15 | 398              | 0.221 | 1.65e-05 | 399  | 0.210 | 3.77e-05 | 0.247         | 5.64e-06 | 14.26 | 2.03e-02 | 78.94          |
| AC C16:1                | 393            | 0.158 | 2.18e-03 | 400               | 0.104 | 4.65e-02 | 398              | 0.075 | 1.49e-01 | 399  | 0.231 | 6.41e-06 | 0.143         | 6.32e-05 | 5.91  | 2.98e-01 | 49.24          |
| AC C16                  | 399            | 0.056 | 2.72e-01 | 399               | 0.187 | 2.87e-04 | 399              | 0.241 | 2.26e-06 | 399  | 0.260 | 3.54e-07 | 0.187         | 7.74e-05 | 10.58 | 7.37e-02 | 71.64          |
| NEFA                    | 399            | 0.043 | 3.96e-01 | 385               | 0.104 | 5.12e-02 | 394              | 0.111 | 3.38e-02 | 399  | 0.173 | 7.38e-04 | 0.108         | 8.07e-05 | 3.43  | 4.47e-01 | 13.31          |

## SUPPLEMENTARY DATA

| Metabolite               | Afro-Caribbean |       |          | Northern European |       |          | Mexican American |       |          | Thai |        |          | Meta-Analysis |          |       |          |                |
|--------------------------|----------------|-------|----------|-------------------|-------|----------|------------------|-------|----------|------|--------|----------|---------------|----------|-------|----------|----------------|
|                          | N              | Corr  | P        | N                 | Corr  | P        | N                | Corr  | P        | N    | Corr   | P        | Corr          | P        | Q     | Q-test P | I <sup>2</sup> |
| AC C14:1                 | 397            | 0.157 | 2.30e-03 | 400               | 0.060 | 2.63e-01 | 398              | 0.179 | 5.77e-04 | 400  | 0.263  | 2.43e-07 | 0.166         | 1.27e-04 | 8.81  | 1.43e-01 | 65.90          |
| AC C14                   | 397            | 0.113 | 2.72e-02 | 399               | 0.048 | 3.77e-01 | 398              | 0.148 | 4.63e-03 | 400  | 0.209  | 3.85e-05 | 0.130         | 1.80e-04 | 5.64  | 3.21e-01 | 46.78          |
| Lactate                  | 398            | 0.100 | 5.03e-02 | 398               | 0.046 | 3.83e-01 | 397              | 0.094 | 6.98e-02 | 399  | 0.138  | 6.83e-03 | 0.095         | 1.91e-04 | 1.73  | 6.94e-01 | 0.00           |
| AC C14:1-OH              | NA             | NA    | NA       | 397               | 0.219 | 2.17e-05 | NA               | NA    | NA       | 390  | 0.124  | 1.61e-02 | 0.172         | 4.56e-04 | 1.88  | 3.76e-01 | 46.91          |
| AC C16-OH/C14-DC         | 384            | 0.299 | 7.50e-09 | 397               | 0.122 | 1.92e-02 | 379              | 0.098 | 6.69e-02 | 392  | 0.143  | 5.86e-03 | 0.167         | 4.73e-04 | 10.46 | 7.37e-02 | 71.45          |
| AC C20                   | NA             | NA    | NA       | 397               | 0.047 | 3.82e-01 | 360              | 0.050 | 3.46e-01 | 390  | 0.127  | 1.41e-02 | 0.075         | 1.22e-02 | 1.59  | 5.41e-01 | 0.00           |
| AC C12                   | 398            | 0.163 | 1.52e-03 | 400               | 0.016 | 7.58e-01 | 399              | 0.052 | 3.09e-01 | 399  | 0.240  | 2.79e-06 | 0.119         | 2.43e-02 | 13.07 | 3.03e-02 | 77.04          |
| Triglycerides            | 398            | 0.024 | 6.30e-01 | 400               | 0.035 | 5.08e-01 | 395              | 0.128 | 1.55e-02 | 398  | 0.012  | 8.20e-01 | 0.050         | 6.33e-02 | 3.33  | 4.47e-01 | 9.54           |
| Asparagine/Aspartic acid | 394            | 0.123 | 1.68e-02 | 396               | 0.014 | 7.88e-01 | 395              | 0.088 | 8.97e-02 | 398  | -0.002 | 9.66e-01 | 0.056         | 6.58e-02 | 4.24  | 4.26e-01 | 29.28          |
| Arginine                 | 399            | 0.068 | 1.89e-01 | 399               | 0.054 | 3.17e-01 | 398              | 0.014 | 7.77e-01 | 400  | 0.029  | 5.88e-01 | 0.041         | 1.03e-01 | 0.69  | 8.92e-01 | 0.00           |
| AC C14-OH/C12-DC         | NA             | NA    | NA       | 385               | 0.327 | 2.10e-10 | NA               | NA    | NA       | 386  | 0.070  | 1.80e-01 | 0.202         | 1.29e-01 | 13.91 | 2.60e-03 | 92.81          |

Both ancestry-specific and meta-analysis p-values represent the p-value after FDR adjustment

SUPPLEMENTARY DATA

**Supplementary Table 2.** Associations of Maternal Phenotypes with Newborn Cord Metabolites.

| Metabolite                                                                  | Afro-Caribbean  |          | Northern European |          | Mexican American |          | Thai            |          | Meta-Analysis   |          |       |          |                |
|-----------------------------------------------------------------------------|-----------------|----------|-------------------|----------|------------------|----------|-----------------|----------|-----------------|----------|-------|----------|----------------|
|                                                                             | Beta(SE)        | P        | Beta(SE)          | P        | Beta(SE)         | P        | Beta(SE)        | P        | Beta(SE)        | P        | Q     | Q-test P | I <sup>2</sup> |
| <b>Maternal BMI Adjusted for Fasting Glucose – Newborn Cord Metabolites</b> |                 |          |                   |          |                  |          |                 |          |                 |          |       |          |                |
| AC C4/Ci4                                                                   | 0.0068(0.0030)  | 1.96e-01 | 0.0091(0.0037)    | 2.60e-01 | 0.0077(0.0034)   | 1.56e-01 | 0.0096(0.0043)  | 3.64e-01 | 0.0080(0.0018)  | 2.91e-04 | 0.41  | 9.72e-01 | 0.00           |
| Phenylalanine                                                               | 0.2228(0.0937)  | 1.83e-01 | 0.1656(0.1150)    | 5.82e-01 | 0.3819(0.1323)   | 7.12e-02 | 0.2628(0.1355)  | 5.74e-01 | 0.2459(0.0576)  | 3.24e-04 | 1.62  | 9.66e-01 | 0.00           |
| AC C3                                                                       | 0.0091(0.0034)  | 1.24e-01 | 0.0085(0.0037)    | 3.27e-01 | 0.0091(0.0036)   | 9.61e-02 | 0.0035(0.0047)  | 8.50e-01 | 0.0080(0.0019)  | 3.24e-04 | 1.13  | 9.66e-01 | 0.00           |
| Valine                                                                      | 0.4843(0.2958)  | 4.02e-01 | 1.0866(0.2994)    | 1.74e-02 | 1.3778(0.4588)   | 7.12e-02 | 1.5754(0.4653)  | 2.11e-02 | 1.0463(0.2469)  | 3.24e-04 | 5.32  | 9.66e-01 | 44.83          |
| Leucine/Isoleucine                                                          | 0.3126(0.2415)  | 6.26e-01 | 0.6151(0.2454)    | 2.60e-01 | 1.3533(0.3669)   | 1.34e-02 | 1.2696(0.3512)  | 1.83e-02 | 0.8297(0.2514)  | 1.04e-02 | 8.45  | 6.76e-01 | 65.78          |
| AC C5                                                                       | 0.0068(0.0047)  | 5.17e-01 | 0.0097(0.0051)    | 5.17e-01 | 0.0143(0.0057)   | 9.61e-02 | 0.0030(0.0072)  | 8.70e-01 | 0.0088(0.0027)  | 1.12e-02 | 1.76  | 9.66e-01 | 0.00           |
| Serine                                                                      | 0.2182(0.1309)  | 4.02e-01 | 0.2620(0.1798)    | 5.82e-01 | 0.1033(0.2298)   | 9.08e-01 | 0.4140(0.2416)  | 5.91e-01 | 0.2384(0.0893)  | 5.86e-02 | 0.92  | 9.66e-01 | 0.00           |
| AC C5-DC                                                                    | 0.0094(0.0031)  | 7.21e-02 | 0.0034(0.0030)    | 6.48e-01 | 0.0017(0.0033)   | 9.08e-01 | 0.0044(0.0044)  | 8.50e-01 | 0.0048(0.0019)  | 6.64e-02 | 3.23  | 9.66e-01 | 18.28          |
| Tyrosine                                                                    | 0.2043(0.0985)  | 2.81e-01 | 0.0722(0.1201)    | 8.70e-01 | 0.1603(0.1343)   | 7.52e-01 | 0.1305(0.1369)  | 8.50e-01 | 0.1491(0.0596)  | 7.45e-02 | 0.75  | 9.66e-01 | 0.00           |
| NEFA                                                                        | -0.0002(0.0007) | 9.81e-01 | -0.0013(0.0008)   | 5.82e-01 | -0.0019(0.0008)  | 1.41e-01 | -0.0008(0.0009) | 8.50e-01 | -0.0010(0.0004) | 7.81e-02 | 2.58  | 9.66e-01 | 0.00           |
| Proline                                                                     | 0.2154(0.1980)  | 6.52e-01 | 0.3303(0.2441)    | 5.99e-01 | 0.0680(0.2619)   | 9.21e-01 | 0.7778(0.3185)  | 2.71e-01 | 0.2952(0.1224)  | 7.81e-02 | 3.23  | 9.66e-01 | 0.01           |
| Arginine                                                                    | 0.1563(0.1325)  | 6.52e-01 | 0.0279(0.1647)    | 9.54e-01 | 0.4446(0.1760)   | 9.61e-02 | 0.1457(0.2084)  | 8.50e-01 | 0.1853(0.0819)  | 1.06e-01 | 3.17  | 9.66e-01 | 0.00           |
| AC C2                                                                       | 0.0054(0.0032)  | 4.02e-01 | 0.0024(0.0032)    | 7.45e-01 | 0.0013(0.0032)   | 9.08e-01 | 0.0054(0.0056)  | 8.50e-01 | 0.0033(0.0017)  | 2.41e-01 | 1.06  | 9.66e-01 | 0.00           |
| AC C6-DC/C8-OH                                                              | 0.0018(0.0048)  | 9.81e-01 | -0.0103(0.0053)   | 5.17e-01 | -0.0057(0.0056)  | 7.52e-01 | -0.0127(0.0074) | 5.91e-01 | -0.0058(0.0034) | 3.27e-01 | 4.03  | 9.66e-01 | 31.11          |
| Lactate                                                                     | -0.0085(0.0151) | 9.04e-01 | -0.0128(0.0150)   | 7.45e-01 | -0.0252(0.0143)  | 4.11e-01 | 0.0022(0.0219)  | 9.58e-01 | -0.0135(0.0080) | 3.27e-01 | 1.30  | 9.66e-01 | 0.00           |
| Ornithine                                                                   | 0.0989(0.1121)  | 6.68e-01 | -0.1262(0.1517)   | 7.45e-01 | 0.2205(0.1668)   | 6.95e-01 | 0.2289(0.1391)  | 6.04e-01 | 0.1051(0.0712)  | 4.74e-01 | 3.60  | 9.66e-01 | 5.78           |
| AC C8:1                                                                     | 0.0083(0.0044)  | 3.75e-01 | -0.0038(0.0047)   | 7.45e-01 | 0.0034(0.0048)   | 9.08e-01 | 0.0093(0.0085)  | 8.50e-01 | 0.0036(0.0031)  | 6.78e-01 | 4.01  | 9.66e-01 | 29.48          |
| AC C8:1-OH/C6:1-DC                                                          | 0.0058(0.0034)  | 4.02e-01 | -0.0022(0.0043)   | 9.19e-01 | 0.0004(0.0040)   | 9.66e-01 | 0.0064(0.0059)  | 8.50e-01 | 0.0025(0.0021)  | 6.78e-01 | 2.84  | 9.66e-01 | 4.44           |
| AC C8                                                                       | 0.0040(0.0040)  | 6.52e-01 | -0.0015(0.0046)   | 9.51e-01 | 0.0040(0.0037)   | 7.52e-01 | 0.0016(0.0058)  | 9.21e-01 | 0.0024(0.0022)  | 6.78e-01 | 1.10  | 9.66e-01 | 0.00           |
| Asparagine/Aspartic acid                                                    | 0.1389(0.0534)  | 1.24e-01 | 0.0951(0.0809)    | 6.48e-01 | 0.0758(0.0758)   | 7.52e-01 | -0.1172(0.0869) | 8.50e-01 | 0.0600(0.0532)  | 6.78e-01 | 6.38  | 9.66e-01 | 53.01          |
| AC C10-OH/C8-DC                                                             | 0.0007(0.0056)  | 9.81e-01 | -0.0049(0.0051)   | 7.45e-01 | -0.0053(0.0055)  | 7.61e-01 | -0.0027(0.0069) | 8.70e-01 | -0.0032(0.0028) | 6.78e-01 | 0.74  | 9.66e-01 | 0.00           |
| AC C20                                                                      | NA              | NA       | -0.0002(0.0038)   | 9.95e-01 | 0.0051(0.0051)   | 7.52e-01 | 0.0033(0.0054)  | 8.50e-01 | 0.0021(0.0026)  | 7.90e-01 | 0.77  | 9.66e-01 | 0.00           |
| Methionine                                                                  | 0.0568(0.0396)  | 5.17e-01 | -0.0807(0.0462)   | 5.51e-01 | 0.1528(0.0549)   | 7.38e-02 | 0.0609(0.0622)  | 8.50e-01 | 0.0446(0.0486)  | 7.90e-01 | 11.33 | 2.72e-01 | 73.74          |
| AC C14                                                                      | -0.0009(0.0038) | 9.81e-01 | -0.0064(0.0042)   | 5.82e-01 | -0.0002(0.0038)  | 9.73e-01 | -0.0003(0.0050) | 9.58e-01 | -0.0019(0.0021) | 7.90e-01 | 1.52  | 9.66e-01 | 0.00           |
| AC C18:2                                                                    | -0.0010(0.0033) | 9.81e-01 | -0.0061(0.0034)   | 5.40e-01 | 0.0004(0.0031)   | 9.66e-01 | 0.0028(0.0045)  | 8.50e-01 | -0.0013(0.0018) | 7.90e-01 | 3.20  | 9.66e-01 | 3.52           |
| AC C14:2                                                                    | -0.0002(0.0041) | 9.81e-01 | -0.0018(0.0041)   | 9.44e-01 | -0.0054(0.0047)  | 7.52e-01 | 0.0009(0.0054)  | 9.58e-01 | -0.0017(0.0022) | 7.90e-01 | 1.00  | 9.66e-01 | 0.00           |
| AC C18:1-DC                                                                 | -0.0011(0.0032) | 9.81e-01 | -0.0008(0.0039)   | 9.51e-01 | -0.0027(0.0039)  | 9.08e-01 | -0.0030(0.0054) | 8.50e-01 | -0.0017(0.0020) | 7.90e-01 | 0.20  | 9.77e-01 | 0.00           |
| AC C12-OH/C10-DC                                                            | -0.0003(0.0056) | 9.81e-01 | -0.0024(0.0055)   | 9.44e-01 | -0.0045(0.0072)  | 9.08e-01 | -0.0052(0.0090) | 8.50e-01 | -0.0025(0.0032) | 7.90e-01 | 0.33  | 9.72e-01 | 0.00           |
| AC C16:1-OH/C14:1-DC                                                        | -0.0040(0.0046) | 6.68e-01 | 0.0001(0.0037)    | 9.95e-01 | -0.0024(0.0042)  | 9.08e-01 | -0.0009(0.0064) | 9.58e-01 | -0.0017(0.0022) | 7.90e-01 | 0.53  | 9.66e-01 | 0.00           |
| AC C12                                                                      | 0.0029(0.0034)  | 6.68e-01 | -0.0037(0.0047)   | 7.45e-01 | -0.0058(0.0037)  | 5.65e-01 | -0.0025(0.0054) | 8.70e-01 | -0.0020(0.0025) | 7.90e-01 | 3.26  | 9.66e-01 | 31.15          |
| AC C18                                                                      | -0.0033(0.0027) | 6.52e-01 | -0.0021(0.0031)   | 8.32e-01 | 0.0012(0.0035)   | 9.21e-01 | 0.0011(0.0040)  | 9.21e-01 | -0.0013(0.0016) | 7.90e-01 | 1.43  | 9.66e-01 | 0.00           |
| AC C18-OH/C16-DC                                                            | 0.0025(0.0027)  | 6.68e-01 | 0.0033(0.0031)    | 6.87e-01 | -0.0021(0.0038)  | 9.08e-01 | -0.0021(0.0043) | 8.70e-01 | 0.0012(0.0016)  | 7.95e-01 | 2.02  | 9.66e-01 | 0.00           |
| AC C12:1                                                                    | -0.0002(0.0042) | 9.81e-01 | 0.0004(0.0046)    | 9.91e-01 | -0.0038(0.0041)  | 7.62e-01 | -0.0027(0.0065) | 8.70e-01 | -0.0015(0.0023) | 8.09e-01 | 0.61  | 9.66e-01 | 0.00           |
| AC C18:1                                                                    | 0.0015(0.0033)  | 9.45e-01 | -0.0010(0.0036)   | 9.51e-01 | 0.0048(0.0033)   | 6.09e-01 | -0.0026(0.0045) | 8.50e-01 | 0.0012(0.0018)  | 8.09e-01 | 2.22  | 9.66e-01 | 0.00           |
| AC C4-OH                                                                    | 0.0072(0.0069)  | 6.52e-01 | 0.0038(0.0076)    | 9.19e-01 | -0.0031(0.0075)  | 9.08e-01 | -0.0035(0.0115) | 9.21e-01 | 0.0021(0.0040)  | 8.44e-01 | 1.31  | 9.66e-01 | 0.00           |
| AC C20-OH/C18-DC                                                            | 0.0006(0.0034)  | 9.81e-01 | -0.0000(0.0037)   | 9.95e-01 | -0.0023(0.0045)  | 9.08e-01 | -0.0057(0.0054) | 8.50e-01 | -0.0011(0.0020) | 8.44e-01 | 1.12  | 9.66e-01 | 0.00           |
| AC C14-OH/C12-DC                                                            | NA              | NA       | 0.0056(0.0034)    | 5.82e-01 | NA               | NA       | -0.0027(0.0050) | 8.50e-01 | 0.0023(0.0040)  | 8.44e-01 | 1.82  | 9.66e-01 | 45.06          |
| AC C16:1                                                                    | 0.0020(0.0037)  | 9.04e-01 | -0.0046(0.0049)   | 7.45e-01 | 0.0045(0.0039)   | 7.52e-01 | 0.0003(0.0053)  | 9.58e-01 | 0.0012(0.0021)  | 8.44e-01 | 2.22  | 9.66e-01 | 0.00           |
| 3-Hydroxybutyrate                                                           | 0.0003(0.0087)  | 9.81e-01 | 0.0022(0.0099)    | 9.51e-01 | -0.0056(0.0102)  | 9.08e-01 | -0.0122(0.0147) | 8.50e-01 | -0.0022(0.0051) | 8.71e-01 | 0.87  | 9.66e-01 | 0.00           |
| Glutamine/Glutamic acid                                                     | 1.1512(0.3496)  | 5.51e-02 | 0.3708(0.3520)    | 6.87e-01 | -0.1051(0.3105)  | 9.21e-01 | -0.9289(0.5026) | 5.88e-01 | 0.1639(0.4146)  | 8.71e-01 | 13.57 | 1.92e-01 | 80.12          |
| Citrulline                                                                  | -0.0242(0.0241) | 6.52e-01 | 0.0217(0.0250)    | 7.45e-01 | -0.0026(0.0290)  | 9.66e-01 | -0.0424(0.0435) | 8.50e-01 | -0.0065(0.0141) | 8.71e-01 | 2.51  | 9.66e-01 | 0.00           |
| AC C14:1-OH                                                                 | NA              | NA       | 0.0006(0.0032)    | 9.54e-01 | NA               | NA       | -0.0046(0.0045) | 8.50e-01 | -0.0012(0.0026) | 8.71e-01 | 0.86  | 9.66e-01 | 0.00           |

SUPPLEMENTARY DATA

| Metabolite                                                                               | Afro-Caribbean  |          | Northern European |          | Mexican American |          | Thai            |          | Meta-Analysis   |          |      |          |                |
|------------------------------------------------------------------------------------------|-----------------|----------|-------------------|----------|------------------|----------|-----------------|----------|-----------------|----------|------|----------|----------------|
|                                                                                          | Beta(SE)        | P        | Beta(SE)          | P        | Beta(SE)         | P        | Beta(SE)        | P        | Beta(SE)        | P        | Q    | Q-test P | I <sup>2</sup> |
| Triglycerides                                                                            | 0.0027(0.1118)  | 9.81e-01 | -0.2036(0.1610)   | 6.20e-01 | -0.0645(0.1344)  | 9.08e-01 | 0.1007(0.1382)  | 8.50e-01 | -0.0262(0.0665) | 8.71e-01 | 2.21 | 9.66e-01 | 0.00           |
| Glycine                                                                                  | 0.2602(0.2681)  | 6.52e-01 | -0.1249(0.3411)   | 9.51e-01 | -0.0158(0.4613)  | 9.73e-01 | -0.2760(0.4597) | 8.50e-01 | 0.0365(0.1770)  | 9.10e-01 | 1.39 | 9.66e-01 | 0.00           |
| AC C10:3                                                                                 | 0.0046(0.0046)  | 6.52e-01 | -0.0067(0.0051)   | 6.15e-01 | -0.0029(0.0048)  | 9.08e-01 | 0.0070(0.0103)  | 8.50e-01 | -0.0007(0.0031) | 9.10e-01 | 3.44 | 9.66e-01 | 20.54          |
| AC C10:1                                                                                 | -0.0003(0.0038) | 9.81e-01 | -0.0004(0.0039)   | 9.91e-01 | 0.0006(0.0038)   | 9.66e-01 | 0.0054(0.0061)  | 8.50e-01 | 0.0006(0.0021)  | 9.10e-01 | 0.76 | 9.66e-01 | 0.00           |
| Alanine                                                                                  | 0.4663(0.6698)  | 8.01e-01 | -1.2528(0.8440)   | 5.82e-01 | 0.0777(0.8728)   | 9.66e-01 | 1.3489(1.0679)  | 8.50e-01 | 0.0986(0.4879)  | 9.10e-01 | 4.24 | 9.66e-01 | 25.57          |
| AC C16                                                                                   | -0.0012(0.0026) | 9.45e-01 | -0.0036(0.0030)   | 6.48e-01 | 0.0025(0.0028)   | 7.67e-01 | 0.0007(0.0030)  | 9.40e-01 | -0.0004(0.0014) | 9.10e-01 | 2.45 | 9.66e-01 | 0.00           |
| AC C10:2                                                                                 | 0.0003(0.0038)  | 9.81e-01 | -0.0011(0.0045)   | 9.51e-01 | 0.0035(0.0048)   | 9.08e-01 | -0.0009(0.0072) | 9.58e-01 | 0.0005(0.0023)  | 9.10e-01 | 0.55 | 9.66e-01 | 0.00           |
| AC C16-OH/C14-DC                                                                         | -0.0048(0.0049) | 6.52e-01 | 0.0010(0.0045)    | 9.51e-01 | -0.0013(0.0050)  | 9.21e-01 | 0.0064(0.0072)  | 8.50e-01 | -0.0005(0.0026) | 9.10e-01 | 1.81 | 9.66e-01 | 0.00           |
| AC C8:1-DC                                                                               | 0.0065(0.0037)  | 4.02e-01 | -0.0030(0.0039)   | 7.45e-01 | -0.0056(0.0039)  | 6.09e-01 | 0.0005(0.0057)  | 9.58e-01 | -0.0004(0.0029) | 9.14e-01 | 5.77 | 9.66e-01 | 48.19          |
| AC C5:1                                                                                  | 0.0010(0.0035)  | 9.81e-01 | -0.0012(0.0046)   | 9.51e-01 | -0.0013(0.0047)  | 9.21e-01 | 0.0038(0.0065)  | 8.50e-01 | 0.0003(0.0022)  | 9.14e-01 | 0.56 | 9.66e-01 | 0.00           |
| AC C14:1                                                                                 | 0.0003(0.0043)  | 9.81e-01 | -0.0068(0.0050)   | 5.99e-01 | 0.0014(0.0046)   | 9.21e-01 | 0.0044(0.0059)  | 8.50e-01 | -0.0004(0.0024) | 9.14e-01 | 2.46 | 9.66e-01 | 0.00           |
| Glycerol                                                                                 | 0.0027(0.0026)  | 6.52e-01 | 0.0009(0.0029)    | 9.51e-01 | -0.0032(0.0028)  | 7.52e-01 | -0.0018(0.0034) | 8.50e-01 | -0.0001(0.0014) | 9.30e-01 | 2.67 | 9.66e-01 | 0.00           |
| <b>Maternal Insulin Sensitivity Adjusted for Maternal BMI – Newborn Cord Metabolites</b> |                 |          |                   |          |                  |          |                 |          |                 |          |      |          |                |
| AC C4/Ci4                                                                                | -0.0298(0.0106) | 8.16e-02 | -0.0064(0.0144)   | 7.56e-01 | -0.0207(0.0153)  | 6.24e-01 | -0.0142(0.0112) | 8.95e-01 | -0.0191(0.0062) | 7.76e-02 | 2.01 | 8.09e-01 | 0.00           |
| AC C3                                                                                    | -0.0340(0.0124) | 8.16e-02 | -0.0106(0.0146)   | 6.68e-01 | -0.0226(0.0162)  | 6.24e-01 | -0.0109(0.0122) | 8.95e-01 | -0.0198(0.0068) | 7.76e-02 | 2.28 | 8.09e-01 | 0.00           |
| AC C5-DC                                                                                 | -0.0170(0.0114) | 3.28e-01 | -0.0199(0.0117)   | 4.29e-01 | -0.0139(0.0153)  | 7.60e-01 | -0.0148(0.0118) | 8.95e-01 | -0.0167(0.0061) | 7.76e-02 | 0.13 | 9.87e-01 | 0.00           |
| AC C5                                                                                    | -0.0462(0.0169) | 8.16e-02 | -0.0182(0.0198)   | 6.27e-01 | -0.0409(0.0252)  | 6.24e-01 | -0.0072(0.0187) | 9.15e-01 | -0.0279(0.0103) | 7.76e-02 | 2.91 | 8.09e-01 | 8.94           |
| AC C6-DC/C8-OH                                                                           | -0.0217(0.0174) | 4.03e-01 | -0.0575(0.0207)   | 2.40e-01 | -0.0524(0.0249)  | 6.24e-01 | -0.0075(0.0191) | 9.15e-01 | -0.0321(0.0119) | 7.76e-02 | 4.19 | 8.09e-01 | 28.65          |
| AC C12:1                                                                                 | -0.0015(0.0154) | 9.38e-01 | -0.0362(0.0180)   | 3.93e-01 | -0.0236(0.0181)  | 6.24e-01 | -0.0392(0.0168) | 5.84e-01 | -0.0239(0.0094) | 9.93e-02 | 3.42 | 8.09e-01 | 18.59          |
| AC C4-OH                                                                                 | -0.0427(0.0250) | 2.42e-01 | -0.0322(0.0296)   | 5.39e-01 | -0.0866(0.0333)  | 2.51e-01 | -0.0001(0.0297) | 9.98e-01 | -0.0385(0.0155) | 9.98e-02 | 3.83 | 8.09e-01 | 12.18          |
| 3-Hydroxybutyrate                                                                        | -0.0208(0.0314) | 7.21e-01 | -0.0790(0.0385)   | 3.93e-01 | -0.0645(0.0460)  | 6.24e-01 | -0.0348(0.0380) | 8.95e-01 | -0.0452(0.0187) | 1.06e-01 | 1.63 | 8.09e-01 | 0.00           |
| AC C16                                                                                   | -0.0194(0.0096) | 1.91e-01 | -0.0165(0.0117)   | 4.70e-01 | -0.0052(0.0124)  | 9.10e-01 | -0.0059(0.0079) | 9.05e-01 | -0.0113(0.0050) | 1.27e-01 | 1.61 | 8.09e-01 | 0.00           |
| Alanine                                                                                  | -5.5210(2.4195) | 1.68e-01 | -2.9450(3.3010)   | 6.29e-01 | -2.8122(3.8751)  | 7.60e-01 | -1.0407(2.7671) | 9.15e-01 | -3.3419(1.4748) | 1.27e-01 | 1.54 | 8.09e-01 | 0.00           |
| AC C12                                                                                   | -0.0039(0.0124) | 8.88e-01 | -0.0333(0.0182)   | 4.08e-01 | -0.0196(0.0166)  | 6.51e-01 | -0.0190(0.0139) | 8.95e-01 | -0.0161(0.0074) | 1.44e-01 | 1.96 | 8.09e-01 | 0.00           |
| AC C8                                                                                    | 0.0034(0.0144)  | 9.22e-01 | -0.0242(0.0178)   | 4.70e-01 | -0.0248(0.0165)  | 6.24e-01 | -0.0341(0.0148) | 5.84e-01 | -0.0192(0.0091) | 1.52e-01 | 3.68 | 8.09e-01 | 24.62          |
| Glycerol                                                                                 | -0.0311(0.0094) | 5.19e-02 | -0.0077(0.0114)   | 6.89e-01 | 0.0012(0.0126)   | 9.58e-01 | -0.0125(0.0087) | 8.95e-01 | -0.0139(0.0067) | 1.52e-01 | 5.08 | 8.09e-01 | 41.17          |
| AC C2                                                                                    | -0.0164(0.0115) | 3.43e-01 | -0.0135(0.0124)   | 5.39e-01 | -0.0386(0.0142)  | 2.51e-01 | 0.0047(0.0145)  | 9.15e-01 | -0.0160(0.0078) | 1.52e-01 | 4.62 | 8.09e-01 | 30.20          |
| Glutamine/Glutamic acid                                                                  | 0.8761(1.2683)  | 7.14e-01 | 1.9780(1.3796)    | 4.70e-01 | 1.1810(1.3734)   | 7.60e-01 | 1.4073(1.3042)  | 8.95e-01 | 1.3409(0.6644)  | 1.52e-01 | 0.36 | 9.66e-01 | 0.00           |
| AC C18:1                                                                                 | -0.0204(0.0120) | 2.42e-01 | -0.0238(0.0142)   | 4.29e-01 | -0.0025(0.0148)  | 9.58e-01 | -0.0053(0.0117) | 9.15e-01 | -0.0130(0.0065) | 1.52e-01 | 1.89 | 8.09e-01 | 0.00           |
| AC C8:1-DC                                                                               | -0.0171(0.0135) | 4.01e-01 | -0.0193(0.0151)   | 5.20e-01 | -0.0245(0.0173)  | 6.24e-01 | 0.0034(0.0148)  | 9.31e-01 | -0.0138(0.0075) | 2.07e-01 | 1.92 | 8.09e-01 | 0.00           |
| Serine                                                                                   | 0.3982(0.4763)  | 6.14e-01 | 0.3499(0.7025)    | 7.56e-01 | 0.2388(1.0247)   | 9.58e-01 | 1.1590(0.6286)  | 8.95e-01 | 0.5672(0.3175)  | 2.07e-01 | 1.21 | 8.81e-01 | 0.00           |
| AC C10:1                                                                                 | -0.0011(0.0138) | 9.38e-01 | -0.0246(0.0152)   | 4.41e-01 | -0.0078(0.0168)  | 9.01e-01 | -0.0229(0.0156) | 8.95e-01 | -0.0136(0.0076) | 2.07e-01 | 1.82 | 8.09e-01 | 0.00           |
| AC C14:1                                                                                 | -0.0056(0.0154) | 8.88e-01 | -0.0390(0.0195)   | 3.93e-01 | -0.0147(0.0205)  | 7.60e-01 | -0.0102(0.0154) | 9.15e-01 | -0.0152(0.0086) | 2.07e-01 | 1.98 | 8.09e-01 | 0.00           |
| Leucine/Isoleucine                                                                       | -1.6742(0.8734) | 1.91e-01 | 0.0784(0.9591)    | 9.55e-01 | -2.7824(1.6220)  | 6.24e-01 | -0.3584(0.9103) | 9.15e-01 | -0.9111(0.5248) | 2.07e-01 | 3.53 | 8.09e-01 | 7.64           |
| AC C14                                                                                   | -0.0249(0.0137) | 2.07e-01 | -0.0242(0.0164)   | 4.70e-01 | 0.0118(0.0167)   | 7.60e-01 | -0.0099(0.0130) | 9.05e-01 | -0.0129(0.0075) | 2.07e-01 | 3.47 | 8.09e-01 | 3.89           |
| AC C14:2                                                                                 | 0.0029(0.0152)  | 9.38e-01 | -0.0297(0.0159)   | 4.08e-01 | -0.0069(0.0207)  | 9.32e-01 | -0.0183(0.0140) | 8.95e-01 | -0.0136(0.0080) | 2.07e-01 | 2.43 | 8.09e-01 | 0.00           |
| AC C16:1                                                                                 | -0.0136(0.0137) | 5.29e-01 | -0.0370(0.0189)   | 3.93e-01 | -0.0014(0.0172)  | 9.58e-01 | -0.0071(0.0137) | 9.15e-01 | -0.0130(0.0077) | 2.08e-01 | 2.26 | 8.09e-01 | 0.00           |
| Lactate                                                                                  | -0.1091(0.0545) | 1.91e-01 | -0.0454(0.0587)   | 6.59e-01 | -0.0467(0.0631)  | 7.60e-01 | 0.0171(0.0567)  | 9.15e-01 | -0.0473(0.0290) | 2.13e-01 | 2.58 | 8.09e-01 | 0.00           |
| Methionine                                                                               | -0.2111(0.1438) | 3.31e-01 | -0.0142(0.1805)   | 9.55e-01 | -0.2311(0.2433)  | 7.60e-01 | -0.1115(0.1615) | 9.15e-01 | -0.1402(0.0863) | 2.13e-01 | 0.90 | 9.11e-01 | 0.00           |
| AC C10-OH/C8-DC                                                                          | -0.0029(0.0200) | 9.38e-01 | -0.0339(0.0200)   | 4.29e-01 | -0.0388(0.0246)  | 6.24e-01 | -0.0010(0.0180) | 9.98e-01 | -0.0164(0.0101) | 2.13e-01 | 2.78 | 8.09e-01 | 0.00           |
| AC C20                                                                                   | NA              | NA       | 0.0206(0.0147)    | 4.70e-01 | 0.0072(0.0227)   | 9.32e-01 | 0.0111(0.0139)  | 9.05e-01 | 0.0142(0.0092)  | 2.40e-01 | 0.34 | 9.11e-01 | 0.00           |
| Ornithine                                                                                | 0.1211(0.4072)  | 8.88e-01 | 0.3245(0.5919)    | 7.56e-01 | 0.8490(0.7377)   | 6.51e-01 | 0.3051(0.3605)  | 8.95e-01 | 0.3021(0.2330)  | 3.49e-01 | 0.75 | 9.11e-01 | 0.00           |
| Triglycerides                                                                            | 0.3357(0.4064)  | 6.14e-01 | -1.5616(0.6281)   | 2.40e-01 | -0.4287(0.5971)  | 7.60e-01 | -0.5786(0.3557) | 8.95e-01 | -0.4747(0.3675) | 3.49e-01 | 6.95 | 8.09e-01 | 57.61          |
| Proline                                                                                  | -1.1856(0.7179) | 2.54e-01 | -0.7444(0.9527)   | 6.59e-01 | -0.1074(1.1629)  | 9.58e-01 | 0.1815(0.8254)  | 9.31e-01 | -0.5588(0.4365) | 3.49e-01 | 1.76 | 8.09e-01 | 0.00           |
| AC C5:1                                                                                  | -0.0238(0.0126) | 1.91e-01 | 0.0194(0.0178)    | 5.39e-01 | -0.0157(0.0209)  | 7.60e-01 | -0.0240(0.0169) | 8.95e-01 | -0.0126(0.0102) | 3.66e-01 | 4.48 | 8.09e-01 | 33.48          |
| AC C16:1-OH/C14:1-DC                                                                     | -0.0316(0.0165) | 1.91e-01 | -0.0080(0.0146)   | 7.56e-01 | -0.0015(0.0188)  | 9.58e-01 | 0.0032(0.0166)  | 9.35e-01 | -0.0099(0.0082) | 3.68e-01 | 2.57 | 8.09e-01 | 0.00           |

SUPPLEMENTARY DATA

| Metabolite                                                                           | Afro-Caribbean  |          | Northern European |          | Mexican American |          | Thai            |          | Meta-Analysis   |          |      |          |                |
|--------------------------------------------------------------------------------------|-----------------|----------|-------------------|----------|------------------|----------|-----------------|----------|-----------------|----------|------|----------|----------------|
|                                                                                      | Beta(SE)        | P        | Beta(SE)          | P        | Beta(SE)         | P        | Beta(SE)        | P        | Beta(SE)        | P        | Q    | Q-test P | I <sup>2</sup> |
| AC C18                                                                               | -0.0133(0.0099) | 3.67e-01 | -0.0054(0.0122)   | 7.56e-01 | -0.0016(0.0155)  | 9.58e-01 | -0.0032(0.0102) | 9.15e-01 | -0.0068(0.0057) | 3.68e-01 | 0.68 | 9.11e-01 | 0.00           |
| Arginine                                                                             | 1.2381(0.4792)  | 1.03e-01 | 0.6720(0.6427)    | 5.52e-01 | -0.0595(0.7819)  | 9.58e-01 | -0.2672(0.5399) | 9.15e-01 | 0.4591(0.3900)  | 3.69e-01 | 4.97 | 8.09e-01 | 41.77          |
| AC C16-OH/C14-DC                                                                     | -0.0157(0.0178) | 6.02e-01 | -0.0215(0.0175)   | 5.26e-01 | -0.0142(0.0222)  | 7.96e-01 | 0.0088(0.0187)  | 9.15e-01 | -0.0109(0.0094) | 3.69e-01 | 1.58 | 8.09e-01 | 0.00           |
| AC C14:1-OH                                                                          | NA              | NA       | 0.0057(0.0125)    | 7.56e-01 | NA               | NA       | 0.0133(0.0117)  | 8.95e-01 | 0.0097(0.0085)  | 3.73e-01 | 0.20 | 8.09e-01 | 0.00           |
| AC C8:1                                                                              | -0.0072(0.0160) | 8.31e-01 | -0.0272(0.0186)   | 4.70e-01 | -0.0234(0.0214)  | 6.80e-01 | 0.0223(0.0221)  | 8.95e-01 | -0.0102(0.0095) | 4.05e-01 | 3.43 | 8.09e-01 | 0.17           |
| Tyrosine                                                                             | -0.4842(0.3571) | 3.67e-01 | -0.0206(0.4699)   | 9.65e-01 | -0.3435(0.5948)  | 8.15e-01 | -0.0086(0.3565) | 9.98e-01 | -0.2137(0.2082) | 4.22e-01 | 1.12 | 8.87e-01 | 0.00           |
| AC C10:3                                                                             | -0.0021(0.0169) | 9.38e-01 | -0.0225(0.0201)   | 5.39e-01 | -0.0388(0.0212)  | 6.24e-01 | 0.0262(0.0267)  | 8.95e-01 | -0.0116(0.0116) | 4.31e-01 | 4.26 | 8.09e-01 | 21.05          |
| AC C10:2                                                                             | 0.0045(0.0137)  | 8.88e-01 | -0.0211(0.0173)   | 5.26e-01 | -0.0284(0.0213)  | 6.24e-01 | 0.0006(0.0188)  | 9.98e-01 | -0.0078(0.0085) | 4.65e-01 | 2.54 | 8.09e-01 | 0.00           |
| Phenylalanine                                                                        | -0.6455(0.3392) | 1.91e-01 | -0.0881(0.4491)   | 8.94e-01 | -0.7035(0.5848)  | 6.51e-01 | 0.3084(0.3523)  | 8.95e-01 | -0.2391(0.2622) | 4.65e-01 | 4.59 | 8.09e-01 | 37.54          |
| AC C12-OH/C10-DC                                                                     | -0.0016(0.0201) | 9.38e-01 | -0.0547(0.0219)   | 2.40e-01 | -0.0006(0.0317)  | 9.86e-01 | 0.0079(0.0232)  | 9.15e-01 | -0.0135(0.0154) | 4.77e-01 | 4.90 | 8.09e-01 | 40.79          |
| AC C18-OH/C16-DC                                                                     | 0.0106(0.0100)  | 4.91e-01 | -0.0097(0.0119)   | 6.59e-01 | 0.0193(0.0166)   | 6.51e-01 | 0.0043(0.0112)  | 9.15e-01 | 0.0050(0.0059)  | 4.91e-01 | 2.58 | 8.09e-01 | 0.00           |
| Valine                                                                               | -2.2054(1.0690) | 1.91e-01 | 0.8637(1.1692)    | 6.68e-01 | -1.1827(2.0351)  | 8.15e-01 | -0.1090(1.2068) | 9.98e-01 | -0.6313(0.7900) | 5.09e-01 | 4.06 | 8.09e-01 | 33.33          |
| Glycine                                                                              | -0.5439(0.9735) | 7.63e-01 | 1.4404(1.3298)    | 5.39e-01 | -0.3908(2.0461)  | 9.58e-01 | 1.3140(1.1927)  | 8.95e-01 | 0.4187(0.6261)  | 5.91e-01 | 2.29 | 8.09e-01 | 0.35           |
| AC C14-OH/C12-DC                                                                     | NA              | NA       | -0.0068(0.0135)   | 7.56e-01 | NA               | NA       | -0.0028(0.0131) | 9.31e-01 | -0.0047(0.0094) | 7.05e-01 | 0.04 | 9.11e-01 | 0.00           |
| AC C18:2                                                                             | -0.0246(0.0118) | 1.91e-01 | -0.0050(0.0132)   | 7.76e-01 | 0.0102(0.0138)   | 7.60e-01 | 0.0071(0.0116)  | 9.15e-01 | -0.0036(0.0082) | 7.45e-01 | 5.01 | 8.09e-01 | 40.76          |
| Citrulline                                                                           | 0.1034(0.0879)  | 4.38e-01 | 0.0479(0.0979)    | 7.56e-01 | -0.0488(0.1285)  | 9.16e-01 | -0.1067(0.1125) | 8.95e-01 | 0.0187(0.0518)  | 7.91e-01 | 2.54 | 8.09e-01 | 0.00           |
| Asparagine/Aspartic acid                                                             | -0.4539(0.1913) | 1.54e-01 | 0.2521(0.3171)    | 6.59e-01 | 0.1369(0.3342)   | 9.10e-01 | 0.0808(0.2253)  | 9.15e-01 | -0.0501(0.1798) | 8.43e-01 | 5.80 | 8.09e-01 | 48.71          |
| AC C18:1-DC                                                                          | 0.0248(0.0121)  | 1.91e-01 | 0.0052(0.0151)    | 7.90e-01 | -0.0152(0.0174)  | 7.60e-01 | -0.0127(0.0140) | 8.95e-01 | 0.0023(0.0099)  | 8.66e-01 | 5.63 | 8.09e-01 | 47.06          |
| AC C20-OH/C18-DC                                                                     | 0.0069(0.0127)  | 7.63e-01 | -0.0198(0.0146)   | 4.70e-01 | -0.0144(0.0199)  | 7.60e-01 | 0.0148(0.0138)  | 8.95e-01 | -0.0010(0.0085) | 9.40e-01 | 3.84 | 8.09e-01 | 23.98          |
| AC C8:1-OH/C6:1-DC                                                                   | -0.0133(0.0124) | 4.91e-01 | 0.0166(0.0167)    | 5.77e-01 | -0.0244(0.0177)  | 6.24e-01 | 0.0254(0.0153)  | 8.95e-01 | 0.0009(0.0116)  | 9.54e-01 | 6.81 | 8.09e-01 | 55.98          |
| NEFA                                                                                 | -0.0014(0.0025) | 7.63e-01 | -0.0014(0.0033)   | 7.58e-01 | 0.0068(0.0037)   | 6.24e-01 | -0.0015(0.0024) | 9.15e-01 | -0.0000(0.0017) | 9.82e-01 | 4.19 | 8.09e-01 | 26.62          |
| <b>Maternal Fasting Glucose Adjusted for Maternal BMI – Newborn Cord Metabolites</b> |                 |          |                   |          |                  |          |                 |          |                 |          |      |          |                |
| 3-Hydroxybutyrate                                                                    | 0.0013(0.0076)  | 9.85e-01 | 0.0185(0.0086)    | 6.74e-01 | 0.0205(0.0072)   | 1.19e-01 | 0.0108(0.0082)  | 6.36e-01 | 0.0128(0.0046)  | 2.95e-01 | 3.92 | 8.02e-01 | 26.79          |
| Arginine                                                                             | -0.2189(0.1166) | 9.85e-01 | -0.1082(0.1435)   | 7.18e-01 | -0.1507(0.1229)  | 7.18e-01 | -0.0992(0.1162) | 6.36e-01 | -0.1474(0.0617) | 4.57e-01 | 0.62 | 9.25e-01 | 0.00           |
| Tyrosine                                                                             | -0.0737(0.0867) | 9.85e-01 | -0.1376(0.1046)   | 7.18e-01 | 0.0359(0.0937)   | 8.88e-01 | -0.1627(0.0763) | 6.36e-01 | -0.0905(0.0448) | 5.70e-01 | 2.96 | 8.02e-01 | 2.01           |
| Glutamine/Glutamic acid                                                              | -0.4679(0.3068) | 9.85e-01 | -0.6108(0.3069)   | 6.74e-01 | -0.0062(0.2164)  | 9.77e-01 | -0.2973(0.2803) | 6.36e-01 | -0.2902(0.1475) | 5.70e-01 | 3.14 | 8.02e-01 | 15.32          |
| AC C8:1                                                                              | -0.0005(0.0039) | 9.85e-01 | 0.0081(0.0041)    | 6.74e-01 | 0.0083(0.0034)   | 1.82e-01 | 0.0013(0.0048)  | 8.51e-01 | 0.0046(0.0024)  | 5.70e-01 | 4.16 | 8.02e-01 | 30.60          |
| Citrulline                                                                           | -0.0419(0.0212) | 9.85e-01 | -0.0198(0.0218)   | 7.18e-01 | 0.0031(0.0202)   | 8.95e-01 | -0.0188(0.0242) | 6.77e-01 | -0.0188(0.0109) | 6.67e-01 | 2.35 | 8.02e-01 | 0.00           |
| Glycine                                                                              | -0.4297(0.2353) | 9.85e-01 | -0.0682(0.2971)   | 9.54e-01 | 0.1995(0.3221)   | 7.69e-01 | -0.4353(0.2565) | 6.36e-01 | -0.2405(0.1403) | 6.67e-01 | 3.42 | 8.02e-01 | 5.87           |
| NEFA                                                                                 | -0.0005(0.0006) | 9.85e-01 | 0.0000(0.0007)    | 9.65e-01 | -0.0007(0.0006)  | 7.18e-01 | -0.0005(0.0005) | 6.36e-01 | -0.0005(0.0003) | 7.28e-01 | 0.68 | 9.25e-01 | 0.00           |
| Phenylalanine                                                                        | -0.0547(0.0825) | 9.85e-01 | -0.0260(0.1002)   | 9.54e-01 | 0.0290(0.0923)   | 8.90e-01 | -0.1543(0.0755) | 6.36e-01 | -0.0635(0.0431) | 7.28e-01 | 2.60 | 8.02e-01 | 0.00           |
| AC C20                                                                               | NA              | NA       | -0.0010(0.0033)   | 9.39e-01 | -0.0042(0.0036)  | 7.24e-01 | -0.0032(0.0030) | 6.36e-01 | -0.0028(0.0019) | 7.28e-01 | 0.48 | 9.20e-01 | 0.00           |
| AC C4-OH                                                                             | 0.0020(0.0061)  | 9.85e-01 | 0.0055(0.0066)    | 7.18e-01 | 0.0187(0.0052)   | 1.90e-02 | -0.0014(0.0064) | 8.53e-01 | 0.0067(0.0047)  | 7.28e-01 | 7.52 | 8.02e-01 | 58.71          |
| Methionine                                                                           | -0.0437(0.0349) | 9.85e-01 | 0.0269(0.0402)    | 7.18e-01 | -0.0102(0.0384)  | 8.95e-01 | -0.0624(0.0347) | 6.36e-01 | -0.0263(0.0189) | 7.28e-01 | 3.26 | 8.02e-01 | 4.80           |
| AC C10:3                                                                             | -0.0029(0.0041) | 9.85e-01 | 0.0063(0.0045)    | 7.18e-01 | 0.0060(0.0033)   | 6.16e-01 | 0.0028(0.0057)  | 7.84e-01 | 0.0032(0.0024)  | 7.28e-01 | 3.47 | 8.02e-01 | 24.57          |
| AC C10:1                                                                             | 0.0012(0.0033)  | 9.85e-01 | 0.0023(0.0034)    | 7.18e-01 | 0.0015(0.0026)   | 7.71e-01 | 0.0035(0.0034)  | 6.36e-01 | 0.0021(0.0016)  | 7.28e-01 | 0.30 | 9.60e-01 | 0.00           |
| AC C18-OH/C16-DC                                                                     | 0.0007(0.0023)  | 9.85e-01 | 0.0004(0.0027)    | 9.54e-01 | -0.0035(0.0026)  | 7.18e-01 | -0.0045(0.0024) | 6.36e-01 | -0.0017(0.0014) | 7.58e-01 | 3.51 | 8.02e-01 | 17.12          |
| Glycerol                                                                             | 0.0014(0.0023)  | 9.85e-01 | 0.0044(0.0025)    | 7.18e-01 | 0.0012(0.0020)   | 7.69e-01 | -0.0008(0.0019) | 8.02e-01 | 0.0012(0.0011)  | 7.58e-01 | 2.81 | 8.02e-01 | 0.00           |
| AC C14                                                                               | -0.0005(0.0033) | 9.85e-01 | 0.0046(0.0037)    | 7.18e-01 | 0.0024(0.0026)   | 7.31e-01 | 0.0007(0.0028)  | 8.51e-01 | 0.0017(0.0015)  | 7.58e-01 | 1.25 | 8.90e-01 | 0.00           |
| AC C14:1-OH                                                                          | NA              | NA       | -0.0006(0.0028)   | 9.54e-01 | NA               | NA       | -0.0032(0.0025) | 6.36e-01 | -0.0020(0.0019) | 7.58e-01 | 0.47 | 8.02e-01 | 0.00           |
| AC C18:2                                                                             | -0.0005(0.0029) | 9.85e-01 | 0.0032(0.0029)    | 7.18e-01 | 0.0013(0.0022)   | 7.69e-01 | 0.0013(0.0025)  | 7.82e-01 | 0.0013(0.0013)  | 7.58e-01 | 0.81 | 9.25e-01 | 0.00           |
| Alanine                                                                              | 0.5258(0.5897)  | 9.85e-01 | 1.1083(0.7351)    | 7.18e-01 | 0.5010(0.6098)   | 7.31e-01 | -0.5413(0.5953) | 6.36e-01 | 0.3372(0.3339)  | 7.58e-01 | 3.45 | 8.02e-01 | 12.06          |
| AC C12:1                                                                             | -0.0043(0.0037) | 9.85e-01 | 0.0052(0.0040)    | 7.18e-01 | 0.0049(0.0028)   | 6.30e-01 | 0.0020(0.0036)  | 7.82e-01 | 0.0022(0.0022)  | 7.58e-01 | 4.53 | 8.02e-01 | 33.43          |
| AC C3                                                                                | 0.0024(0.0030)  | 9.85e-01 | 0.0028(0.0033)    | 7.18e-01 | 0.0038(0.0025)   | 7.01e-01 | -0.0023(0.0026) | 6.36e-01 | 0.0015(0.0016)  | 7.58e-01 | 3.12 | 8.02e-01 | 16.94          |
| Ornithine                                                                            | -0.0953(0.0987) | 9.85e-01 | 0.0058(0.1321)    | 9.65e-01 | 0.0776(0.1163)   | 7.69e-01 | -0.0927(0.0775) | 6.36e-01 | -0.0478(0.0500) | 7.58e-01 | 1.89 | 8.03e-01 | 0.00           |
| AC C14:2                                                                             | -0.0042(0.0036) | 9.85e-01 | 0.0041(0.0036)    | 7.18e-01 | 0.0042(0.0033)   | 7.18e-01 | 0.0021(0.0030)  | 7.06e-01 | 0.0017(0.0018)  | 7.58e-01 | 3.71 | 8.02e-01 | 14.74          |

SUPPLEMENTARY DATA

| Metabolite                                                                            | Afro-Caribbean  |          | Northern European |          | Mexican American |          | Thai            |          | Meta-Analysis   |          |       |          |                |
|---------------------------------------------------------------------------------------|-----------------|----------|-------------------|----------|------------------|----------|-----------------|----------|-----------------|----------|-------|----------|----------------|
|                                                                                       | Beta(SE)        | P        | Beta(SE)          | P        | Beta(SE)         | P        | Beta(SE)        | P        | Beta(SE)        | P        | Q     | Q-test P | I <sup>2</sup> |
| AC C5                                                                                 | 0.0057(0.0041)  | 9.85e-01 | 0.0017(0.0044)    | 9.24e-01 | 0.0027(0.0040)   | 7.69e-01 | -0.0025(0.0040) | 7.44e-01 | 0.0019(0.0021)  | 7.58e-01 | 2.09  | 8.03e-01 | 0.00           |
| AC C8:1-OH/C6:1-DC                                                                    | 0.0007(0.0030)  | 9.85e-01 | 0.0026(0.0037)    | 7.18e-01 | 0.0030(0.0028)   | 7.31e-01 | -0.0008(0.0033) | 8.51e-01 | 0.0014(0.0016)  | 7.58e-01 | 0.93  | 9.21e-01 | 0.00           |
| AC C8                                                                                 | -0.0018(0.0035) | 9.85e-01 | 0.0020(0.0040)    | 8.29e-01 | 0.0022(0.0026)   | 7.31e-01 | 0.0022(0.0032)  | 7.06e-01 | 0.0013(0.0016)  | 8.14e-01 | 1.00  | 9.20e-01 | 0.00           |
| AC C2                                                                                 | -0.0008(0.0028) | 9.85e-01 | 0.0033(0.0028)    | 7.18e-01 | 0.0059(0.0022)   | 1.48e-01 | -0.0033(0.0031) | 6.36e-01 | 0.0016(0.0021)  | 8.55e-01 | 7.17  | 8.02e-01 | 57.85          |
| AC C18:1-DC                                                                           | -0.0028(0.0029) | 9.85e-01 | -0.0005(0.0034)   | 9.54e-01 | 0.0005(0.0027)   | 8.95e-01 | -0.0015(0.0030) | 7.84e-01 | -0.0011(0.0015) | 8.66e-01 | 0.74  | 9.25e-01 | 0.00           |
| AC C20-OH/C18-DC                                                                      | -0.0010(0.0030) | 9.85e-01 | 0.0025(0.0033)    | 7.18e-01 | -0.0035(0.0031)  | 7.24e-01 | -0.0014(0.0030) | 7.96e-01 | -0.0009(0.0015) | 9.39e-01 | 1.82  | 8.04e-01 | 0.00           |
| AC C12-OH/C10-DC                                                                      | -0.0009(0.0049) | 9.85e-01 | 0.0041(0.0048)    | 7.18e-01 | -0.0048(0.0050)  | 7.31e-01 | -0.0038(0.0050) | 6.83e-01 | -0.0012(0.0025) | 9.39e-01 | 2.00  | 8.03e-01 | 0.00           |
| Asparagine/Aspartic acid                                                              | 0.0105(0.0467)  | 9.85e-01 | -0.0413(0.0711)   | 7.78e-01 | -0.0538(0.0530)  | 7.31e-01 | 0.0123(0.0484)  | 8.51e-01 | -0.0120(0.0264) | 9.39e-01 | 1.27  | 8.90e-01 | 0.00           |
| AC C16                                                                                | -0.0008(0.0023) | 9.85e-01 | 0.0030(0.0026)    | 7.18e-01 | 0.0028(0.0019)   | 7.01e-01 | -0.0018(0.0017) | 6.36e-01 | 0.0006(0.0013)  | 9.39e-01 | 4.46  | 8.02e-01 | 36.94          |
| AC C8:1-DC                                                                            | 0.0002(0.0032)  | 9.85e-01 | 0.0039(0.0033)    | 7.18e-01 | 0.0015(0.0027)   | 7.91e-01 | -0.0030(0.0032) | 6.36e-01 | 0.0007(0.0016)  | 9.39e-01 | 2.34  | 8.02e-01 | 0.00           |
| AC C16:1-OH/C14:1-DC                                                                  | -0.0013(0.0040) | 9.85e-01 | 0.0041(0.0032)    | 7.18e-01 | -0.0048(0.0030)  | 6.59e-01 | -0.0009(0.0036) | 8.51e-01 | -0.0008(0.0022) | 9.39e-01 | 4.18  | 8.02e-01 | 37.23          |
| AC C4/Ci4                                                                             | 0.0002(0.0026)  | 9.85e-01 | 0.0010(0.0032)    | 9.39e-01 | 0.0035(0.0024)   | 7.01e-01 | -0.0025(0.0024) | 6.36e-01 | 0.0005(0.0014)  | 9.39e-01 | 3.13  | 8.02e-01 | 18.38          |
| AC C14-OH/C12-DC                                                                      | NA              | NA       | -0.0010(0.0030)   | 9.39e-01 | NA               | NA       | -0.0005(0.0028) | 8.71e-01 | -0.0007(0.0021) | 9.39e-01 | 0.01  | 9.30e-01 | 0.00           |
| AC C6-DC/C8-OH                                                                        | -0.0001(0.0042) | 9.90e-01 | 0.0045(0.0046)    | 7.18e-01 | 0.0055(0.0039)   | 7.01e-01 | -0.0061(0.0041) | 6.36e-01 | 0.0009(0.0027)  | 9.39e-01 | 4.99  | 8.02e-01 | 40.64          |
| Leucine/Isoleucine                                                                    | 0.0430(0.2127)  | 9.85e-01 | 0.1989(0.2137)    | 7.18e-01 | 0.2109(0.2562)   | 7.31e-01 | -0.2119(0.1957) | 6.36e-01 | 0.0350(0.1083)  | 9.39e-01 | 2.65  | 8.02e-01 | 0.00           |
| AC C5-DC                                                                              | -0.0000(0.0028) | 9.90e-01 | 0.0022(0.0026)    | 7.18e-01 | -0.0004(0.0024)  | 8.95e-01 | -0.0031(0.0025) | 6.36e-01 | -0.0004(0.0013) | 9.39e-01 | 2.15  | 8.03e-01 | 0.00           |
| AC C18:1                                                                              | -0.0023(0.0029) | 9.85e-01 | 0.0047(0.0032)    | 7.18e-01 | 0.0026(0.0023)   | 7.24e-01 | -0.0025(0.0025) | 6.36e-01 | 0.0005(0.0017)  | 9.39e-01 | 4.98  | 8.02e-01 | 39.05          |
| Proline                                                                               | -0.1987(0.1743) | 9.85e-01 | 0.1418(0.2126)    | 7.18e-01 | 0.1689(0.1831)   | 7.31e-01 | -0.1561(0.1776) | 6.36e-01 | -0.0269(0.0976) | 9.39e-01 | 3.27  | 8.02e-01 | 9.76           |
| AC C12                                                                                | -0.0017(0.0030) | 9.85e-01 | 0.0044(0.0041)    | 7.18e-01 | 0.0007(0.0026)   | 8.95e-01 | -0.0001(0.0030) | 9.81e-01 | 0.0004(0.0015)  | 9.39e-01 | 1.46  | 8.89e-01 | 0.00           |
| AC C10:2                                                                              | -0.0034(0.0033) | 9.85e-01 | -0.0003(0.0039)   | 9.65e-01 | 0.0014(0.0034)   | 8.77e-01 | 0.0011(0.0040)  | 8.51e-01 | -0.0005(0.0018) | 9.39e-01 | 1.25  | 8.90e-01 | 0.00           |
| AC C5:1                                                                               | 0.0034(0.0031)  | 9.85e-01 | -0.0007(0.0040)   | 9.54e-01 | -0.0020(0.0033)  | 7.69e-01 | -0.0036(0.0036) | 6.36e-01 | -0.0004(0.0017) | 9.39e-01 | 2.51  | 8.02e-01 | 0.00           |
| AC C14:1                                                                              | -0.0021(0.0038) | 9.85e-01 | 0.0055(0.0044)    | 7.18e-01 | 0.0025(0.0032)   | 7.41e-01 | -0.0028(0.0033) | 6.36e-01 | 0.0004(0.0018)  | 9.39e-01 | 3.18  | 8.02e-01 | 1.10           |
| AC C18                                                                                | 0.0006(0.0024)  | 9.85e-01 | 0.0031(0.0027)    | 7.18e-01 | 0.0009(0.0024)   | 8.88e-01 | -0.0025(0.0022) | 6.36e-01 | 0.0002(0.0012)  | 9.39e-01 | 2.71  | 8.02e-01 | 0.00           |
| AC C10-OH/C8-DC                                                                       | -0.0014(0.0049) | 9.85e-01 | 0.0033(0.0046)    | 7.18e-01 | 0.0031(0.0039)   | 7.31e-01 | -0.0033(0.0039) | 6.36e-01 | 0.0004(0.0021)  | 9.39e-01 | 1.94  | 8.03e-01 | 0.00           |
| Valine                                                                                | 0.1476(0.2604)  | 9.85e-01 | 0.2260(0.2608)    | 7.18e-01 | 0.0549(0.3206)   | 8.95e-01 | -0.3211(0.2593) | 6.36e-01 | 0.0233(0.1360)  | 9.39e-01 | 2.61  | 8.02e-01 | 0.00           |
| Serine                                                                                | -0.1993(0.1152) | 9.85e-01 | 0.1261(0.1567)    | 7.18e-01 | 0.3767(0.1602)   | 2.00e-01 | -0.3677(0.1346) | 3.56e-01 | -0.0270(0.1643) | 9.39e-01 | 15.49 | 7.80e-02 | 81.81          |
| AC C16:1                                                                              | -0.0028(0.0032) | 9.85e-01 | 0.0046(0.0042)    | 7.18e-01 | 0.0028(0.0027)   | 7.31e-01 | -0.0042(0.0029) | 6.36e-01 | -0.0002(0.0021) | 9.62e-01 | 4.96  | 8.02e-01 | 39.15          |
| Lactate                                                                               | -0.0033(0.0133) | 9.85e-01 | -0.0016(0.0131)   | 9.54e-01 | 0.0094(0.0100)   | 7.31e-01 | -0.0119(0.0122) | 6.36e-01 | -0.0005(0.0059) | 9.62e-01 | 1.91  | 8.03e-01 | 0.00           |
| Triglycerides                                                                         | -0.1162(0.0985) | 9.85e-01 | 0.3280(0.1403)    | 6.74e-01 | -0.0146(0.0947)  | 8.95e-01 | -0.0743(0.0768) | 6.36e-01 | 0.0058(0.0834)  | 9.62e-01 | 7.61  | 8.02e-01 | 64.53          |
| AC C16-OH/C14-DC                                                                      | 0.0004(0.0044)  | 9.85e-01 | 0.0041(0.0039)    | 7.18e-01 | 0.0011(0.0035)   | 8.90e-01 | -0.0064(0.0040) | 6.36e-01 | -0.0001(0.0022) | 9.63e-01 | 3.74  | 8.02e-01 | 18.79          |
| <b>Maternal One Hour Glucose Adjusted for Maternal BMI – Newborn Cord Metabolites</b> |                 |          |                   |          |                  |          |                 |          |                 |          |       |          |                |
| 3-Hydroxybutyrate                                                                     | 0.0052(0.0018)  | 1.14e-01 | 0.0042(0.0018)    | 2.95e-01 | 0.0042(0.0015)   | 1.03e-01 | 0.0029(0.0017)  | 3.86e-01 | 0.0041(0.0008)  | 4.50e-05 | 0.87  | 9.92e-01 | 0.00           |
| AC C4-OH                                                                              | 0.0031(0.0015)  | 5.42e-01 | 0.0021(0.0014)    | 3.54e-01 | 0.0032(0.0011)   | 1.03e-01 | 0.0023(0.0013)  | 3.86e-01 | 0.0027(0.0006)  | 4.28e-04 | 0.62  | 9.92e-01 | 0.00           |
| AC C10-OH/C8-DC                                                                       | 0.0013(0.0012)  | 7.78e-01 | 0.0018(0.0009)    | 2.95e-01 | 0.0018(0.0008)   | 3.44e-01 | 0.0016(0.0008)  | 3.86e-01 | 0.0017(0.0004)  | 3.26e-03 | 0.17  | 9.92e-01 | 0.00           |
| Glycerol                                                                              | 0.0010(0.0006)  | 7.42e-01 | 0.0006(0.0005)    | 5.24e-01 | 0.0008(0.0004)   | 5.13e-01 | 0.0007(0.0004)  | 3.86e-01 | 0.0008(0.0002)  | 9.08e-03 | 0.34  | 9.92e-01 | 0.00           |
| AC C12:1                                                                              | 0.0006(0.0009)  | 8.03e-01 | 0.0017(0.0008)    | 2.95e-01 | 0.0005(0.0006)   | 9.88e-01 | 0.0014(0.0008)  | 3.86e-01 | 0.0009(0.0004)  | 9.25e-02 | 1.93  | 9.92e-01 | 0.00           |
| AC C14:1                                                                              | 0.0009(0.0009)  | 7.78e-01 | 0.0015(0.0009)    | 3.33e-01 | 0.0003(0.0007)   | 9.88e-01 | 0.0013(0.0007)  | 3.86e-01 | 0.0010(0.0004)  | 9.25e-02 | 1.48  | 9.92e-01 | 0.00           |
| AC C2                                                                                 | 0.0008(0.0007)  | 7.78e-01 | 0.0005(0.0006)    | 6.57e-01 | 0.0008(0.0005)   | 5.77e-01 | 0.0006(0.0006)  | 7.30e-01 | 0.0007(0.0003)  | 9.25e-02 | 0.19  | 9.92e-01 | 0.00           |
| AC C18:1                                                                              | 0.0004(0.0007)  | 8.03e-01 | 0.0014(0.0007)    | 2.95e-01 | 0.0003(0.0005)   | 9.88e-01 | 0.0009(0.0005)  | 3.86e-01 | 0.0007(0.0003)  | 9.38e-02 | 2.21  | 9.92e-01 | 0.00           |
| Lactate                                                                               | 0.0029(0.0032)  | 7.78e-01 | 0.0049(0.0027)    | 2.95e-01 | 0.0021(0.0020)   | 9.77e-01 | 0.0020(0.0025)  | 7.46e-01 | 0.0028(0.0012)  | 1.38e-01 | 0.85  | 9.92e-01 | 0.00           |
| AC C12                                                                                | 0.0004(0.0007)  | 8.03e-01 | 0.0014(0.0008)    | 3.02e-01 | 0.0003(0.0005)   | 9.88e-01 | 0.0011(0.0006)  | 3.86e-01 | 0.0007(0.0003)  | 1.47e-01 | 2.06  | 9.92e-01 | 0.00           |
| Phenylalanine                                                                         | -0.0314(0.0198) | 7.42e-01 | -0.0278(0.0206)   | 4.38e-01 | 0.0053(0.0188)   | 9.88e-01 | -0.0258(0.0156) | 3.86e-01 | -0.0200(0.0092) | 1.47e-01 | 2.43  | 9.92e-01 | 0.00           |
| AC C16:1                                                                              | 0.0005(0.0008)  | 8.03e-01 | 0.0016(0.0009)    | 2.95e-01 | 0.0001(0.0006)   | 9.88e-01 | 0.0014(0.0006)  | 3.86e-01 | 0.0008(0.0004)  | 1.83e-01 | 3.38  | 9.92e-01 | 24.20          |
| AC C8                                                                                 | 0.0011(0.0008)  | 7.42e-01 | 0.0012(0.0008)    | 3.67e-01 | 0.0001(0.0005)   | 9.88e-01 | 0.0008(0.0007)  | 6.16e-01 | 0.0006(0.0003)  | 2.76e-01 | 2.12  | 9.92e-01 | 0.00           |
| AC C12-OH/C10-DC                                                                      | 0.0002(0.0012)  | 9.05e-01 | 0.0021(0.0010)    | 2.95e-01 | -0.0000(0.0010)  | 9.88e-01 | 0.0012(0.0010)  | 6.16e-01 | 0.0009(0.0005)  | 2.82e-01 | 2.76  | 9.92e-01 | 0.00           |
| AC C5-DC                                                                              | 0.0010(0.0007)  | 7.42e-01 | 0.0000(0.0005)    | 9.42e-01 | 0.0004(0.0005)   | 9.88e-01 | 0.0007(0.0005)  | 5.49e-01 | 0.0005(0.0003)  | 2.95e-01 | 1.44  | 9.92e-01 | 0.00           |

SUPPLEMENTARY DATA

| Metabolite               | Afro-Caribbean  |          | Northern European |          | Mexican American |          | Thai            |          | Meta-Analysis   |          |       |          |                |
|--------------------------|-----------------|----------|-------------------|----------|------------------|----------|-----------------|----------|-----------------|----------|-------|----------|----------------|
|                          | Beta(SE)        | P        | Beta(SE)          | P        | Beta(SE)         | P        | Beta(SE)        | P        | Beta(SE)        | P        | Q     | Q-test P | I <sup>2</sup> |
| NEFA                     | -0.0001(0.0001) | 8.07e-01 | 0.0003(0.0002)    | 2.95e-01 | 0.0000(0.0001)   | 9.88e-01 | 0.0002(0.0001)  | 3.86e-01 | 0.0001(0.0001)  | 3.48e-01 | 3.90  | 9.92e-01 | 20.89          |
| Glutamine/Glutamic acid  | -0.1133(0.0737) | 7.42e-01 | -0.1124(0.0633)   | 2.95e-01 | -0.0695(0.0438)  | 7.36e-01 | 0.0482(0.0582)  | 7.46e-01 | -0.0576(0.0363) | 3.57e-01 | 4.70  | 9.92e-01 | 35.64          |
| AC C6-DC/C8-OH           | 0.0008(0.0010)  | 8.03e-01 | 0.0008(0.0010)    | 7.10e-01 | 0.0009(0.0008)   | 9.77e-01 | 0.0003(0.0008)  | 9.12e-01 | 0.0007(0.0004)  | 3.73e-01 | 0.27  | 9.92e-01 | 0.00           |
| AC C16:1-OH/C14:1-DC     | 0.0003(0.0010)  | 8.33e-01 | 0.0009(0.0007)    | 4.27e-01 | -0.0001(0.0006)  | 9.88e-01 | 0.0014(0.0007)  | 3.86e-01 | 0.0006(0.0004)  | 3.73e-01 | 3.18  | 9.92e-01 | 19.61          |
| Alanine                  | 0.0525(0.1419)  | 8.07e-01 | 0.1219(0.1518)    | 7.36e-01 | 0.0794(0.1237)   | 9.88e-01 | 0.1344(0.1230)  | 6.75e-01 | 0.0978(0.0667)  | 3.85e-01 | 0.24  | 9.92e-01 | 0.00           |
| AC C8:1-DC               | 0.0007(0.0008)  | 7.78e-01 | 0.0001(0.0007)    | 9.31e-01 | -0.0000(0.0006)  | 9.88e-01 | 0.0012(0.0007)  | 3.86e-01 | 0.0004(0.0003)  | 4.60e-01 | 2.27  | 9.92e-01 | 0.00           |
| AC C10:2                 | 0.0004(0.0008)  | 8.07e-01 | 0.0017(0.0008)    | 2.95e-01 | -0.0001(0.0007)  | 9.88e-01 | 0.0003(0.0008)  | 9.12e-01 | 0.0005(0.0004)  | 4.60e-01 | 3.14  | 9.92e-01 | 7.56           |
| AC C16                   | -0.0001(0.0006) | 9.05e-01 | 0.0005(0.0005)    | 6.57e-01 | -0.0000(0.0004)  | 9.88e-01 | 0.0006(0.0004)  | 3.94e-01 | 0.0003(0.0002)  | 4.64e-01 | 1.99  | 9.92e-01 | 0.00           |
| AC C14:2                 | 0.0009(0.0009)  | 7.78e-01 | 0.0014(0.0007)    | 2.95e-01 | -0.0007(0.0007)  | 9.77e-01 | 0.0010(0.0006)  | 3.94e-01 | 0.0006(0.0005)  | 4.64e-01 | 5.39  | 9.92e-01 | 45.97          |
| AC C16-OH/C14-DC         | 0.0004(0.0010)  | 8.07e-01 | 0.0004(0.0008)    | 8.22e-01 | 0.0007(0.0007)   | 9.77e-01 | 0.0004(0.0008)  | 9.12e-01 | 0.0005(0.0004)  | 4.94e-01 | 0.10  | 9.92e-01 | 0.00           |
| AC C14                   | 0.0001(0.0008)  | 9.05e-01 | 0.0005(0.0008)    | 7.72e-01 | -0.0001(0.0005)  | 9.88e-01 | 0.0010(0.0006)  | 3.86e-01 | 0.0004(0.0003)  | 4.94e-01 | 2.03  | 9.92e-01 | 0.00           |
| AC C8:1-OH/C6:1-DC       | 0.0011(0.0007)  | 7.42e-01 | -0.0006(0.0008)   | 7.72e-01 | 0.0001(0.0006)   | 9.88e-01 | 0.0009(0.0007)  | 5.81e-01 | 0.0004(0.0003)  | 4.94e-01 | 3.32  | 9.92e-01 | 2.95           |
| AC C18-OH/C16-DC         | -0.0005(0.0006) | 7.78e-01 | -0.0003(0.0005)   | 8.22e-01 | -0.0002(0.0005)  | 9.88e-01 | -0.0002(0.0005) | 9.12e-01 | -0.0003(0.0003) | 4.94e-01 | 0.23  | 9.92e-01 | 0.00           |
| AC C4/Ci4                | 0.0004(0.0006)  | 8.03e-01 | 0.0004(0.0007)    | 8.03e-01 | 0.0002(0.0005)   | 9.88e-01 | 0.0003(0.0005)  | 8.94e-01 | 0.0003(0.0003)  | 4.94e-01 | 0.11  | 9.92e-01 | 0.00           |
| AC C18:2                 | 0.0005(0.0007)  | 8.03e-01 | 0.0008(0.0006)    | 4.51e-01 | -0.0002(0.0004)  | 9.88e-01 | 0.0004(0.0005)  | 7.46e-01 | 0.0003(0.0003)  | 4.94e-01 | 1.78  | 9.92e-01 | 0.00           |
| Glycine                  | 0.0023(0.0567)  | 9.88e-01 | -0.0245(0.0612)   | 8.46e-01 | -0.1497(0.0649)  | 3.44e-01 | 0.0071(0.0532)  | 9.67e-01 | -0.0351(0.0338) | 4.94e-01 | 4.21  | 9.92e-01 | 24.48          |
| AC C5                    | 0.0010(0.0010)  | 7.78e-01 | -0.0002(0.0009)   | 9.02e-01 | 0.0010(0.0008)   | 9.77e-01 | 0.0001(0.0008)  | 9.67e-01 | 0.0005(0.0004)  | 4.94e-01 | 1.42  | 9.92e-01 | 0.00           |
| Tyrosine                 | -0.0231(0.0208) | 7.78e-01 | -0.0043(0.0216)   | 9.09e-01 | -0.0104(0.0191)  | 9.88e-01 | -0.0040(0.0159) | 9.42e-01 | -0.0096(0.0095) | 4.94e-01 | 0.61  | 9.92e-01 | 0.00           |
| Valine                   | 0.0271(0.0626)  | 8.07e-01 | -0.1014(0.0536)   | 2.95e-01 | 0.0186(0.0651)   | 9.88e-01 | -0.0379(0.0537) | 7.96e-01 | -0.0307(0.0303) | 4.94e-01 | 3.19  | 9.92e-01 | 8.17           |
| AC C10:1                 | 0.0006(0.0008)  | 8.03e-01 | 0.0009(0.0007)    | 4.51e-01 | -0.0004(0.0005)  | 9.88e-01 | 0.0007(0.0007)  | 7.20e-01 | 0.0004(0.0004)  | 4.94e-01 | 2.70  | 9.92e-01 | 14.30          |
| Ornithine                | -0.0130(0.0237) | 8.03e-01 | 0.0068(0.0272)    | 9.04e-01 | -0.0497(0.0235)  | 3.64e-01 | 0.0018(0.0161)  | 9.67e-01 | -0.0119(0.0122) | 4.94e-01 | 3.78  | 9.92e-01 | 20.84          |
| AC C10:3                 | 0.0004(0.0010)  | 8.07e-01 | 0.0009(0.0009)    | 6.57e-01 | 0.0006(0.0007)   | 9.77e-01 | -0.0010(0.0012) | 7.46e-01 | 0.0004(0.0004)  | 5.28e-01 | 1.69  | 9.92e-01 | 0.00           |
| AC C14-OH/C12-DC         | NA              | NA       | -0.0011(0.0006)   | 2.95e-01 | NA               | NA       | 0.0001(0.0006)  | 9.67e-01 | -0.0005(0.0006) | 5.69e-01 | 2.06  | 9.92e-01 | 51.41          |
| Arginine                 | -0.0253(0.0281) | 7.78e-01 | 0.0153(0.0296)    | 8.22e-01 | -0.0148(0.0250)  | 9.88e-01 | -0.0105(0.0240) | 9.12e-01 | -0.0098(0.0132) | 6.06e-01 | 1.06  | 9.92e-01 | 0.00           |
| Proline                  | 0.0619(0.0419)  | 7.42e-01 | 0.0217(0.0438)    | 8.22e-01 | -0.0361(0.0371)  | 9.77e-01 | 0.0246(0.0367)  | 7.99e-01 | 0.0154(0.0210)  | 6.06e-01 | 3.25  | 9.92e-01 | 11.08          |
| AC C20-OH/C18-DC         | -0.0010(0.0007) | 7.42e-01 | 0.0010(0.0007)    | 3.56e-01 | -0.0008(0.0006)  | 9.77e-01 | -0.0005(0.0006) | 7.46e-01 | -0.0003(0.0005) | 6.06e-01 | 5.68  | 9.92e-01 | 47.22          |
| AC C14:1-OH              | NA              | NA       | -0.0010(0.0006)   | 2.95e-01 | NA               | NA       | 0.0001(0.0005)  | 9.42e-01 | -0.0004(0.0006) | 6.06e-01 | 2.14  | 9.92e-01 | 53.25          |
| Leucine/Isoleucine       | 0.0629(0.0510)  | 7.78e-01 | -0.0145(0.0441)   | 8.92e-01 | 0.0306(0.0520)   | 9.88e-01 | 0.0037(0.0405)  | 9.67e-01 | 0.0161(0.0231)  | 6.08e-01 | 1.49  | 9.92e-01 | 0.00           |
| Methionine               | 0.0001(0.0084)  | 9.93e-01 | 0.0019(0.0083)    | 9.04e-01 | 0.0090(0.0078)   | 9.77e-01 | -0.0004(0.0072) | 9.73e-01 | 0.0026(0.0039)  | 6.20e-01 | 0.95  | 9.92e-01 | 0.00           |
| AC C18                   | -0.0003(0.0006) | 8.07e-01 | 0.0002(0.0006)    | 9.02e-01 | -0.0004(0.0005)  | 9.77e-01 | -0.0000(0.0005) | 9.67e-01 | -0.0002(0.0003) | 6.54e-01 | 0.78  | 9.92e-01 | 0.00           |
| AC C5:1                  | 0.0021(0.0007)  | 1.14e-01 | -0.0015(0.0008)   | 2.95e-01 | 0.0006(0.0007)   | 9.77e-01 | 0.0002(0.0008)  | 9.42e-01 | 0.0004(0.0007)  | 6.54e-01 | 10.84 | 6.82e-01 | 73.56          |
| Citrulline               | -0.0045(0.0051) | 7.78e-01 | -0.0031(0.0045)   | 7.72e-01 | -0.0010(0.0041)  | 9.88e-01 | 0.0035(0.0050)  | 7.96e-01 | -0.0013(0.0023) | 6.54e-01 | 1.47  | 9.92e-01 | 0.00           |
| Triglycerides            | -0.0332(0.0237) | 7.42e-01 | 0.0204(0.0291)    | 7.72e-01 | 0.0080(0.0191)   | 9.88e-01 | 0.0188(0.0159)  | 6.16e-01 | 0.0058(0.0111)  | 6.77e-01 | 3.64  | 9.92e-01 | 13.19          |
| AC C20                   | NA              | NA       | 0.0001(0.0007)    | 9.34e-01 | -0.0001(0.0007)  | 9.88e-01 | 0.0004(0.0006)  | 8.01e-01 | 0.0002(0.0004)  | 7.38e-01 | 0.28  | 9.92e-01 | 0.00           |
| Asparagine/Aspartic acid | 0.0070(0.0112)  | 8.03e-01 | -0.0086(0.0146)   | 8.14e-01 | -0.0131(0.0107)  | 9.77e-01 | 0.0030(0.0100)  | 9.42e-01 | -0.0022(0.0057) | 7.38e-01 | 2.16  | 9.92e-01 | 0.00           |
| AC C8:1                  | 0.0005(0.0009)  | 8.03e-01 | 0.0004(0.0009)    | 8.22e-01 | 0.0003(0.0007)   | 9.88e-01 | -0.0008(0.0010) | 7.46e-01 | 0.0002(0.0004)  | 7.38e-01 | 1.24  | 9.92e-01 | 0.00           |
| Serine                   | -0.0129(0.0277) | 8.07e-01 | -0.0034(0.0323)   | 9.34e-01 | -0.0019(0.0327)  | 9.88e-01 | 0.0008(0.0281)  | 9.78e-01 | -0.0047(0.0150) | 7.84e-01 | 0.13  | 9.92e-01 | 0.00           |
| AC C3                    | 0.0007(0.0007)  | 7.78e-01 | -0.0003(0.0007)   | 8.38e-01 | 0.0001(0.0005)   | 9.88e-01 | -0.0005(0.0005) | 7.20e-01 | -0.0001(0.0003) | 7.94e-01 | 1.95  | 9.92e-01 | 0.00           |
| AC C18:1-DC              | -0.0005(0.0007) | 8.03e-01 | 0.0006(0.0007)    | 7.10e-01 | -0.0000(0.0006)  | 9.88e-01 | 0.0002(0.0006)  | 9.12e-01 | 0.0001(0.0003)  | 8.00e-01 | 1.31  | 9.92e-01 | 0.00           |

Both ancestry-specific and meta-analysis p-values represent the p-value after FDR adjustment

SUPPLEMENTARY DATA

**Supplementary Table 3.** Associations of Newborn Cord Metabolites with Birthweight.

| Metabolite                                    | Afro-Caribbean |          | Northern European |          | Mexican American |          | Thai            |          | Meta-Analysis   |          |      |          |                |
|-----------------------------------------------|----------------|----------|-------------------|----------|------------------|----------|-----------------|----------|-----------------|----------|------|----------|----------------|
|                                               | Beta(SE)       | P        | Beta(SE)          | P        | Beta(SE)         | P        | Beta(SE)        | P        | Beta(SE)        | P        | Q    | Q-test P | I <sup>2</sup> |
| <b>Newborn Cord Metabolites – Birthweight</b> |                |          |                   |          |                  |          |                 |          |                 |          |      |          |                |
| 3-Hydroxybutyrate                             | 71.09(22.67)   | 3.37e-02 | 77.44(24.46)      | 4.50e-02 | 53.34(21.43)     | 2.29e-01 | 35.87(16.87)    | 1.92e-01 | 54.85(10.43)    | 7.85e-06 | 2.64 | 9.69e-01 | 1.11           |
| AC C10-OH/C8-DC                               | 106.09(38.36)  | 6.88e-02 | 105.83(47.93)     | 3.00e-01 | 91.89(41.63)     | 3.32e-01 | 71.19(35.94)    | 2.18e-01 | 91.76(20.14)    | 1.40e-04 | 0.55 | 9.92e-01 | 0.00           |
| AC C4-OH                                      | 77.28(28.37)   | 6.88e-02 | 67.20(32.15)      | 3.35e-01 | 51.98(29.20)     | 4.75e-01 | 45.67(21.66)    | 1.92e-01 | 57.91(13.47)    | 3.07e-04 | 0.91 | 9.88e-01 | 0.00           |
| Proline                                       | 2.37(0.99)     | 1.09e-01 | 1.46(1.00)        | 3.78e-01 | 1.27(0.85)       | 5.92e-01 | 1.76(0.78)      | 1.73e-01 | 1.69(0.45)      | 1.61e-03 | 0.78 | 9.92e-01 | 0.00           |
| Triglycerides                                 | -2.27(1.77)    | 4.64e-01 | -4.91(1.49)       | 4.50e-02 | -2.59(1.64)      | 5.92e-01 | -7.36(1.77)     | 2.15e-03 | -4.27(1.13)     | 1.61e-03 | 5.56 | 9.69e-01 | 45.61          |
| AC C6-DC/C8-OH                                | 57.08(41.17)   | 4.47e-01 | 73.07(45.81)      | 3.78e-01 | 106.10(39.03)    | 2.29e-01 | 56.91(33.88)    | 3.26e-01 | 72.37(19.63)    | 1.76e-03 | 1.09 | 9.88e-01 | 0.00           |
| AC C8:1-DC                                    | 108.26(54.59)  | 2.04e-01 | 102.97(63.74)     | 3.78e-01 | 83.64(57.48)     | 5.92e-01 | 98.04(43.75)    | 1.73e-01 | 98.24(26.66)    | 1.76e-03 | 0.10 | 9.98e-01 | 0.00           |
| Serine                                        | 4.66(1.50)     | 3.37e-02 | 1.52(1.36)        | 5.54e-01 | 1.17(0.96)       | 6.64e-01 | 2.57(1.02)      | 1.26e-01 | 2.25(0.66)      | 4.61e-03 | 4.24 | 9.69e-01 | 22.29          |
| Glutamine/Glutamic acid                       | 0.50(0.57)     | 6.05e-01 | 0.70(0.70)        | 5.80e-01 | 0.25(0.72)       | 9.53e-01 | 1.39(0.49)      | 9.32e-02 | 0.82(0.30)      | 3.60e-02 | 2.28 | 9.69e-01 | 0.00           |
| AC C12-OH/C10-DC                              | 31.17(36.33)   | 6.05e-01 | 44.80(44.93)      | 5.80e-01 | 20.11(31.55)     | 8.98e-01 | 73.18(27.97)    | 1.25e-01 | 45.12(16.82)    | 3.94e-02 | 1.78 | 9.69e-01 | 0.00           |
| Glycine                                       | 2.61(0.73)     | 1.98e-02 | 1.28(0.72)        | 3.78e-01 | 1.28(0.48)       | 8.98e-01 | 1.08(0.54)      | 2.18e-01 | 1.22(0.46)      | 4.14e-02 | 6.96 | 9.69e-01 | 57.35          |
| AC C8:1-OH/C6:1-DC                            | 68.87(58.03)   | 5.23e-01 | 34.76(57.20)      | 7.69e-01 | 72.38(55.60)     | 6.64e-01 | 78.09(41.96)    | 2.64e-01 | 66.16(25.87)    | 4.75e-02 | 0.40 | 9.96e-01 | 0.00           |
| Arginine                                      | 2.59(1.48)     | 2.77e-01 | 0.32(1.49)        | 8.96e-01 | 1.43(1.26)       | 6.64e-01 | 1.99(1.19)      | 3.26e-01 | 1.62(0.67)      | 6.41e-02 | 1.30 | 9.69e-01 | 0.00           |
| AC C10:3                                      | 105.62(42.31)  | 1.09e-01 | 44.81(47.53)      | 5.85e-01 | 28.12(46.23)     | 8.98e-01 | 25.78(24.24)    | 5.92e-01 | 43.34(18.25)    | 6.76e-02 | 2.80 | 9.69e-01 | 3.30           |
| Leucine/Isoleucine                            | 1.54(0.82)     | 2.21e-01 | 0.73(1.00)        | 7.20e-01 | 0.43(0.60)       | 8.85e-01 | 1.04(0.71)      | 4.52e-01 | 0.87(0.37)      | 6.76e-02 | 1.27 | 9.69e-01 | 0.00           |
| AC C14-OH/C12-DC                              | NA             | NA       | 110.82(72.88)     | 3.78e-01 | NA               | NA       | 89.51(50.39)    | 2.95e-01 | 96.41(41.45)    | 6.76e-02 | 0.06 | 9.88e-01 | 0.00           |
| AC C10:2                                      | 124.99(53.75)  | 1.17e-01 | 9.95(55.65)       | 9.02e-01 | 58.75(46.53)     | 6.64e-01 | 33.41(35.17)    | 5.92e-01 | 51.88(22.71)    | 6.82e-02 | 2.71 | 9.69e-01 | 0.00           |
| AC C8:1                                       | 109.10(44.65)  | 1.09e-01 | 0.01(51.47)       | 1.00e+00 | 2.60(46.15)      | 9.81e-01 | 65.56(29.07)    | 1.73e-01 | 51.17(22.46)    | 6.82e-02 | 4.02 | 9.69e-01 | 17.49          |
| AC C4/Ci4                                     | -134.68(66.71) | 2.04e-01 | -97.22(66.55)     | 3.78e-01 | -45.77(64.24)    | 8.85e-01 | -24.22(57.84)   | 8.90e-01 | -71.13(31.75)   | 7.13e-02 | 1.87 | 9.69e-01 | 0.00           |
| Ornithine                                     | 1.94(1.77)     | 5.33e-01 | 2.36(1.61)        | 3.78e-01 | 0.97(1.34)       | 8.85e-01 | 1.93(1.79)      | 5.92e-01 | 1.69(0.80)      | 9.04e-02 | 0.50 | 9.92e-01 | 0.00           |
| Citrulline                                    | 4.95(8.16)     | 6.94e-01 | 15.53(9.76)       | 3.78e-01 | 10.77(7.64)      | 5.92e-01 | 3.77(5.74)      | 7.33e-01 | 7.35(3.70)      | 1.21e-01 | 1.38 | 9.69e-01 | 0.00           |
| Methionine                                    | 5.25(4.98)     | 5.33e-01 | 1.33(5.31)        | 8.96e-01 | 8.65(4.02)       | 3.32e-01 | 1.20(4.00)      | 8.97e-01 | 4.34(2.24)      | 1.28e-01 | 2.12 | 9.69e-01 | 0.00           |
| AC C5:1                                       | 114.13(56.25)  | 2.04e-01 | 75.24(53.88)      | 3.93e-01 | 120.11(46.80)    | 2.29e-01 | -17.48(38.19)   | 8.74e-01 | 67.12(35.63)    | 1.40e-01 | 6.77 | 9.69e-01 | 54.38          |
| AC C20-OH/C18-DC                              | -36.09(62.03)  | 6.97e-01 | -16.75(65.72)     | 8.96e-01 | -28.13(50.24)    | 8.98e-01 | -155.62(46.25)  | 2.28e-02 | -66.11(36.43)   | 1.56e-01 | 5.07 | 9.69e-01 | 42.57          |
| AC C18-OH/C16-DC                              | 64.74(79.13)   | 6.13e-01 | 132.27(80.25)     | 3.78e-01 | 122.01(61.84)    | 4.27e-01 | -13.43(57.39)   | 9.14e-01 | 69.01(38.49)    | 1.58e-01 | 3.42 | 9.69e-01 | 21.68          |
| Phenylalanine                                 | -0.13(2.11)    | 9.69e-01 | -3.77(2.13)       | 3.78e-01 | -1.20(1.68)      | 8.85e-01 | -1.72(1.83)     | 5.92e-01 | -1.64(0.95)     | 1.77e-01 | 1.58 | 9.69e-01 | 0.00           |
| Valine                                        | 0.54(0.67)     | 6.13e-01 | 0.56(0.82)        | 7.24e-01 | 0.42(0.48)       | 8.49e-01 | 0.51(0.54)      | 5.92e-01 | 0.49(0.30)      | 1.96e-01 | 0.04 | 9.98e-01 | 0.00           |
| AC C16-OH/C14-DC                              | 40.67(41.25)   | 5.52e-01 | 54.96(54.96)      | 5.80e-01 | 38.64(45.09)     | 8.49e-01 | 12.96(34.81)    | 8.91e-01 | 32.11(21.15)    | 2.49e-01 | 0.54 | 9.92e-01 | 0.00           |
| AC C10:1                                      | 99.15(51.98)   | 2.21e-01 | -59.90(62.91)     | 5.85e-01 | 30.68(58.63)     | 8.98e-01 | 46.77(41.14)    | 5.92e-01 | 37.91(27.26)    | 3.06e-01 | 3.87 | 9.69e-01 | 9.26           |
| AC C16                                        | 120.97(74.88)  | 3.21e-01 | -27.42(81.57)     | 8.85e-01 | 86.58(79.22)     | 6.81e-01 | 18.42(82.36)    | 9.14e-01 | 53.46(39.67)    | 3.20e-01 | 2.15 | 9.69e-01 | 0.00           |
| Tyrosine                                      | -1.01(2.01)    | 7.30e-01 | 1.78(2.04)        | 6.26e-01 | 1.94(1.65)       | 6.64e-01 | 1.70(1.81)      | 5.92e-01 | 1.21(0.93)      | 3.32e-01 | 1.57 | 9.69e-01 | 0.00           |
| AC C18:1                                      | 59.11(59.67)   | 5.52e-01 | 17.67(67.09)      | 8.96e-01 | 115.21(66.11)    | 4.75e-01 | -16.67(55.35)   | 8.97e-01 | 39.16(30.74)    | 3.42e-01 | 2.56 | 9.69e-01 | 0.00           |
| AC C14:1                                      | -5.21(46.90)   | 9.69e-01 | -121.42(48.58)    | 1.74e-01 | -8.35(47.92)     | 9.53e-01 | -3.61(42.00)    | 9.49e-01 | -32.58(27.71)   | 3.92e-01 | 4.41 | 9.69e-01 | 30.42          |
| AC C18:2                                      | 5.51(60.56)    | 9.69e-01 | -42.91(72.69)     | 7.69e-01 | -18.71(71.13)    | 9.53e-01 | -71.28(55.67)   | 5.17e-01 | -33.92(31.91)   | 4.57e-01 | 0.94 | 9.88e-01 | 0.00           |
| Lactate                                       | 13.74(13.03)   | 5.33e-01 | -20.29(16.39)     | 4.87e-01 | -17.87(15.65)    | 6.64e-01 | -10.88(11.41)   | 5.92e-01 | -7.37(7.84)     | 5.23e-01 | 3.79 | 9.69e-01 | 22.24          |
| AC C8                                         | -2.01(49.99)   | 9.69e-01 | -26.15(53.86)     | 8.47e-01 | 110.76(59.08)    | 4.57e-01 | 28.19(43.35)    | 7.33e-01 | 23.61(25.29)    | 5.23e-01 | 3.30 | 9.69e-01 | 0.00           |
| AC C5                                         | -46.44(42.21)  | 5.33e-01 | 21.17(48.28)      | 8.71e-01 | 17.25(38.87)     | 9.50e-01 | -47.79(34.43)   | 4.71e-01 | -18.39(20.02)   | 5.23e-01 | 2.68 | 9.69e-01 | 0.00           |
| AC C18                                        | 31.19(72.67)   | 7.74e-01 | -53.51(78.55)     | 7.24e-01 | 90.79(63.52)     | 5.92e-01 | 11.97(63.32)    | 9.18e-01 | 26.77(34.33)    | 6.19e-01 | 2.12 | 9.69e-01 | 0.00           |
| AC C16:1-OH/C14:1-DC                          | 38.15(43.65)   | 6.05e-01 | -106.37(66.55)    | 3.78e-01 | 14.36(53.26)     | 9.53e-01 | 46.66(39.18)    | 5.75e-01 | 17.94(23.87)    | 6.22e-01 | 4.25 | 9.69e-01 | 0.00           |
| AC C5-DC                                      | 10.24(68.88)   | 9.69e-01 | -136.25(83.26)    | 3.78e-01 | 9.68(68.83)      | 9.62e-01 | -19.77(60.25)   | 8.97e-01 | -24.84(34.47)   | 6.22e-01 | 2.31 | 9.69e-01 | 0.00           |
| NEFA                                          | 187.01(284.33) | 6.68e-01 | -63.62(295.84)    | 8.96e-01 | -138.74(267.62)  | 8.98e-01 | -359.57(274.05) | 5.14e-01 | -100.61(139.93) | 6.22e-01 | 1.95 | 9.69e-01 | 0.00           |
| AC C12:1                                      | 60.47(46.70)   | 4.64e-01 | -7.19(53.25)      | 9.09e-01 | 10.73(54.50)     | 9.53e-01 | -1.09(38.18)    | 9.77e-01 | 15.30(23.35)    | 6.59e-01 | 1.31 | 9.69e-01 | 0.00           |



SUPPLEMENTARY DATA

| Metabolite                                                           | Afro-Caribbean |          | Northern European |          | Mexican American |          | Thai           |          | Meta-Analysis |          |      |          |                |
|----------------------------------------------------------------------|----------------|----------|-------------------|----------|------------------|----------|----------------|----------|---------------|----------|------|----------|----------------|
|                                                                      | Beta(SE)       | P        | Beta(SE)          | P        | Beta(SE)         | P        | Beta(SE)       | P        | Beta(SE)      | P        | Q    | Q-test P | I <sup>2</sup> |
| AC C18:1-DC                                                          | -12.55(61.49)  | 9.50e-01 | -10.51(63.46)     | 9.02e-01 | -4.44(56.85)     | 9.81e-01 | -31.33(46.15)  | 7.33e-01 | -17.04(27.82) | 6.78e-01 | 0.16 | 9.98e-01 | 0.00           |
| AC C14:2                                                             | 32.97(48.69)   | 6.68e-01 | -160.43(59.58)    | 1.33e-01 | -19.66(47.82)    | 9.53e-01 | 35.80(45.91)   | 6.73e-01 | -22.34(42.58) | 7.36e-01 | 8.16 | 9.69e-01 | 65.31          |
| AC C14                                                               | 56.12(52.55)   | 5.33e-01 | -57.67(58.22)     | 5.80e-01 | 19.49(58.79)     | 9.53e-01 | 22.86(49.51)   | 8.74e-01 | 13.49(27.17)  | 7.41e-01 | 2.20 | 9.69e-01 | 0.00           |
| Asparagine/Aspartic acid                                             | 0.15(3.81)     | 9.69e-01 | -2.61(3.06)       | 6.27e-01 | 0.01(2.98)       | 9.98e-01 | -0.33(2.89)    | 9.49e-01 | -0.75(1.56)   | 7.41e-01 | 0.51 | 9.92e-01 | 0.00           |
| AC C16:1                                                             | 76.53(54.70)   | 4.47e-01 | -78.56(50.29)     | 3.78e-01 | 32.86(57.32)     | 8.98e-01 | -65.84(47.38)  | 4.71e-01 | -12.59(37.74) | 8.46e-01 | 6.24 | 9.69e-01 | 52.11          |
| AC C3                                                                | -41.13(57.64)  | 6.56e-01 | 90.46(65.37)      | 3.93e-01 | -2.88(60.73)     | 9.81e-01 | -52.87(53.00)  | 5.92e-01 | -9.15(29.66)  | 8.46e-01 | 3.32 | 9.69e-01 | 2.10           |
| AC C12                                                               | 32.90(58.45)   | 6.97e-01 | -90.96(52.18)     | 3.78e-01 | -18.39(59.23)    | 9.53e-01 | 36.44(46.54)   | 6.73e-01 | -9.28(31.41)  | 8.46e-01 | 3.96 | 9.69e-01 | 27.12          |
| Alanine                                                              | 0.38(0.29)     | 4.64e-01 | -0.34(0.29)       | 5.23e-01 | 0.05(0.25)       | 9.53e-01 | 0.05(0.23)     | 9.14e-01 | 0.03(0.13)    | 8.61e-01 | 3.04 | 9.69e-01 | 0.00           |
| AC C14:1-OH                                                          | NA             | NA       | 28.81(77.06)      | 8.85e-01 | NA               | NA       | -5.37(56.47)   | 9.49e-01 | 6.57(45.55)   | 9.34e-01 | 0.13 | 9.69e-01 | 0.00           |
| AC C20                                                               | NA             | NA       | -27.06(65.20)     | 8.72e-01 | 49.75(47.55)     | 7.00e-01 | -43.91(47.00)  | 5.92e-01 | -4.15(32.78)  | 9.34e-01 | 2.12 | 9.69e-01 | 16.30          |
| AC C2                                                                | -46.14(62.24)  | 6.50e-01 | -26.06(77.65)     | 8.85e-01 | -14.60(68.74)    | 9.53e-01 | 36.49(44.52)   | 6.73e-01 | -0.80(29.62)  | 9.81e-01 | 1.38 | 9.69e-01 | 0.00           |
| Glycerol                                                             | -129.76(75.69) | 2.78e-01 | 147.49(84.29)     | 3.78e-01 | 22.62(78.40)     | 9.53e-01 | -29.25(74.09)  | 8.91e-01 | -1.31(56.20)  | 9.81e-01 | 6.22 | 9.69e-01 | 51.86          |
| <b>Newborn Cord Metabolites Adjusted for C-Peptide – Birthweight</b> |                |          |                   |          |                  |          |                |          |               |          |      |          |                |
| 3-Hydroxybutyrate                                                    | 86.46(22.29)   | 2.32e-03 | 101.72(23.70)     | 1.21e-03 | 56.63(21.07)     | 2.18e-01 | 42.87(16.64)   | 8.00e-02 | 68.74(13.72)  | 1.54e-05 | 5.24 | 8.98e-01 | 43.16          |
| AC C4-OH                                                             | 89.87(27.82)   | 1.71e-02 | 89.57(31.13)      | 7.73e-02 | 55.12(28.69)     | 4.34e-01 | 46.95(21.33)   | 1.53e-01 | 66.02(13.20)  | 1.54e-05 | 2.25 | 9.51e-01 | 0.00           |
| AC C10-OH/C8-DC                                                      | 102.13(37.65)  | 6.44e-02 | 120.84(46.31)     | 1.27e-01 | 71.71(41.33)     | 4.34e-01 | 73.40(35.39)   | 1.66e-01 | 89.60(19.78)  | 1.06e-04 | 0.96 | 9.51e-01 | 0.00           |
| Serine                                                               | 5.67(1.47)     | 2.32e-03 | 2.48(1.32)        | 3.27e-01 | 1.80(0.96)       | 4.34e-01 | 3.25(1.01)     | 3.78e-02 | 3.07(0.73)    | 3.87e-04 | 5.07 | 8.98e-01 | 37.71          |
| Proline                                                              | 2.24(0.97)     | 1.03e-01 | 1.71(0.97)        | 3.27e-01 | 1.21(0.84)       | 5.97e-01 | 1.76(0.77)     | 1.45e-01 | 1.70(0.44)    | 1.07e-03 | 0.66 | 9.52e-01 | 0.00           |
| AC C6-DC/C8-OH                                                       | 55.17(40.32)   | 3.37e-01 | 72.32(44.23)      | 3.27e-01 | 101.74(38.39)    | 2.18e-01 | 55.95(33.38)   | 3.19e-01 | 70.37(19.24)  | 2.22e-03 | 1.00 | 9.51e-01 | 0.00           |
| Glutamine/Glutamic acid                                              | 0.82(0.56)     | 3.12e-01 | 0.98(0.67)        | 3.59e-01 | 0.69(0.71)       | 7.53e-01 | 1.46(0.49)     | 3.78e-02 | 1.06(0.29)    | 2.22e-03 | 1.13 | 9.51e-01 | 0.00           |
| Leucine/Isoleucine                                                   | 1.68(0.80)     | 1.43e-01 | 1.75(0.98)        | 3.27e-01 | 0.66(0.60)       | 6.70e-01 | 1.43(0.70)     | 1.66e-01 | 1.23(0.37)    | 5.10e-03 | 1.60 | 9.51e-01 | 0.00           |
| AC C8:1-DC                                                           | 90.72(53.71)   | 2.61e-01 | 78.63(61.84)      | 4.41e-01 | 68.50(56.55)     | 6.20e-01 | 97.50(43.10)   | 1.45e-01 | 86.29(26.18)  | 5.87e-03 | 0.19 | 9.98e-01 | 0.00           |
| Glycine                                                              | 3.02(0.72)     | 1.54e-03 | 1.54(0.69)        | 2.92e-01 | 0.58(0.48)       | 6.20e-01 | 1.54(0.54)     | 4.19e-02 | 1.58(0.49)    | 7.52e-03 | 8.20 | 8.98e-01 | 63.71          |
| Ornithine                                                            | 1.91(1.73)     | 4.32e-01 | 3.03(1.56)        | 3.27e-01 | 1.89(1.33)       | 5.97e-01 | 2.44(1.77)     | 4.74e-01 | 2.29(0.78)    | 1.71e-02 | 0.37 | 9.82e-01 | 0.00           |
| Arginine                                                             | 3.16(1.45)     | 1.30e-01 | -0.10(1.44)       | 9.81e-01 | 1.11(1.24)       | 7.53e-01 | 2.50(1.18)     | 1.66e-01 | 1.70(0.66)    | 3.91e-02 | 3.24 | 8.98e-01 | 0.00           |
| Triglycerides                                                        | -0.81(1.77)    | 7.67e-01 | -4.18(1.45)       | 7.73e-02 | -1.83(1.63)      | 6.70e-01 | -7.10(1.75)    | 3.21e-03 | -3.49(1.34)   | 3.91e-02 | 7.80 | 8.98e-01 | 62.50          |
| AC C12-OH/C10-DC                                                     | 32.25(35.62)   | 5.22e-01 | 73.23(43.59)      | 3.27e-01 | 8.25(31.23)      | 9.46e-01 | 79.23(27.55)   | 4.19e-02 | 47.91(18.85)  | 4.25e-02 | 3.44 | 8.98e-01 | 21.09          |
| AC C4/Ci4                                                            | -149.93(65.32) | 1.03e-01 | -107.53(64.32)    | 3.27e-01 | -46.87(63.14)    | 8.22e-01 | -22.12(56.96)  | 8.60e-01 | -77.00(31.08) | 4.77e-02 | 2.63 | 9.51e-01 | 0.00           |
| AC C10:3                                                             | 107.46(41.41)  | 6.44e-02 | 45.56(45.89)      | 6.20e-01 | 35.92(45.47)     | 7.98e-01 | 23.38(23.89)   | 6.18e-01 | 45.57(19.55)  | 6.67e-02 | 3.12 | 8.98e-01 | 14.23          |
| Methionine                                                           | 6.28(4.88)     | 3.39e-01 | 1.21(5.13)        | 9.81e-01 | 8.57(3.95)       | 3.98e-01 | 2.71(3.96)     | 7.03e-01 | 4.96(2.19)    | 7.52e-02 | 1.77 | 9.51e-01 | 0.00           |
| AC C8:1-OH/C6:1-DC                                                   | 59.33(56.90)   | 4.60e-01 | 20.48(55.31)      | 9.60e-01 | 51.86(54.99)     | 7.53e-01 | 76.97(41.33)   | 2.28e-01 | 56.21(25.38)  | 7.69e-02 | 0.68 | 9.52e-01 | 0.00           |
| AC C14-OH/C12-DC                                                     | NA             | NA       | 110.43(70.43)     | 3.31e-01 | NA               | NA       | 78.82(49.71)   | 3.41e-01 | 89.33(40.61)  | 7.69e-02 | 0.13 | 9.51e-01 | 0.00           |
| Citrulline                                                           | 6.96(8.00)     | 5.22e-01 | 14.76(9.43)       | 3.31e-01 | 9.75(7.52)       | 5.97e-01 | 4.99(5.66)     | 6.39e-01 | 7.96(3.63)    | 7.69e-02 | 0.87 | 9.52e-01 | 0.00           |
| AC C8:1                                                              | 113.83(43.69)  | 6.44e-02 | -6.38(49.71)      | 9.81e-01 | 10.06(45.40)     | 9.46e-01 | 59.23(28.73)   | 1.66e-01 | 49.45(22.86)  | 7.85e-02 | 4.30 | 8.98e-01 | 22.58          |
| Tyrosine                                                             | -0.34(1.97)    | 8.81e-01 | 3.00(1.98)        | 3.32e-01 | 2.26(1.63)       | 5.97e-01 | 2.27(1.79)     | 5.27e-01 | 1.87(0.91)    | 9.61e-02 | 1.69 | 9.51e-01 | 0.00           |
| Valine                                                               | 0.56(0.65)     | 5.22e-01 | 0.55(0.79)        | 7.51e-01 | 0.63(0.48)       | 5.97e-01 | 0.59(0.53)     | 5.56e-01 | 0.59(0.29)    | 9.61e-02 | 0.01 | 1.00e+00 | 0.00           |
| AC C18:1                                                             | 77.83(58.54)   | 3.39e-01 | 66.68(65.31)      | 6.16e-01 | 112.80(64.99)    | 4.34e-01 | -2.34(54.68)   | 9.74e-01 | 58.56(30.19)  | 1.15e-01 | 2.06 | 9.51e-01 | 0.00           |
| AC C10:2                                                             | 135.93(52.58)  | 6.44e-02 | 4.50(53.73)       | 9.81e-01 | 41.70(46.04)     | 7.53e-01 | 25.03(34.76)   | 7.02e-01 | 46.30(23.97)  | 1.15e-01 | 3.89 | 8.98e-01 | 11.47          |
| AC C16                                                               | 119.02(73.34)  | 2.83e-01 | 24.37(79.41)      | 9.81e-01 | 102.37(77.92)    | 5.97e-01 | 25.52(81.16)   | 8.60e-01 | 70.69(38.90)  | 1.44e-01 | 1.25 | 9.51e-01 | 0.00           |
| AC C5:1                                                              | 93.66(55.45)   | 2.61e-01 | 46.88(52.31)      | 6.90e-01 | 111.13(46.13)    | 2.85e-01 | -12.46(37.73)  | 8.60e-01 | 54.30(31.25)  | 1.56e-01 | 5.12 | 8.98e-01 | 42.95          |
| AC C16-OH/C14-DC                                                     | 52.46(40.49)   | 3.39e-01 | 75.76(53.12)      | 3.63e-01 | 25.54(44.31)     | 9.46e-01 | 13.85(34.31)   | 8.60e-01 | 35.99(20.75)  | 1.56e-01 | 1.20 | 9.51e-01 | 0.00           |
| Phenylalanine                                                        | -0.91(2.07)    | 7.67e-01 | -3.42(2.05)       | 3.27e-01 | -0.76(1.66)      | 9.46e-01 | -1.77(1.80)    | 6.18e-01 | -1.61(0.94)   | 1.56e-01 | 1.16 | 9.51e-01 | 0.00           |
| AC C18-OH/C16-DC                                                     | 52.43(77.28)   | 6.35e-01 | 161.52(77.52)     | 2.92e-01 | 108.58(60.97)    | 4.34e-01 | -16.53(56.49)  | 8.60e-01 | 68.86(40.21)  | 1.56e-01 | 4.17 | 8.98e-01 | 30.77          |
| AC C20-OH/C18-DC                                                     | -42.66(60.32)  | 6.27e-01 | 10.61(63.67)      | 9.81e-01 | -27.78(49.37)    | 9.46e-01 | -141.13(46.19) | 3.78e-02 | -57.21(34.79) | 1.74e-01 | 4.82 | 8.98e-01 | 39.44          |
| AC C12:1                                                             | 91.09(46.11)   | 1.78e-01 | 36.21(52.00)      | 7.51e-01 | 1.84(53.65)      | 9.73e-01 | 10.52(37.74)   | 8.60e-01 | 34.00(23.00)  | 2.35e-01 | 2.28 | 9.51e-01 | 0.00           |
| AC C10:1                                                             | 125.52(51.09)  | 8.19e-02 | -44.41(60.84)     | 7.51e-01 | 25.56(57.65)     | 9.46e-01 | 48.77(40.53)   | 5.56e-01 | 44.67(31.87)  | 2.64e-01 | 4.76 | 8.98e-01 | 34.57          |

SUPPLEMENTARY DATA

| Metabolite               | Afro-Caribbean |          | Northern European |          | Mexican American |          | Thai            |          | Meta-Analysis |          |      |          |                |
|--------------------------|----------------|----------|-------------------|----------|------------------|----------|-----------------|----------|---------------|----------|------|----------|----------------|
|                          | Beta(SE)       | P        | Beta(SE)          | P        | Beta(SE)         | P        | Beta(SE)        | P        | Beta(SE)      | P        | Q    | Q-test P | I <sup>2</sup> |
| AC C5                    | -63.64(41.46)  | 3.05e-01 | 14.05(46.65)      | 9.81e-01 | 13.17(38.23)     | 9.46e-01 | -55.30(33.95)   | 3.31e-01 | -26.37(20.94) | 3.30e-01 | 3.35 | 8.98e-01 | 11.39          |
| AC C8                    | 17.20(49.16)   | 8.06e-01 | -10.16(52.11)     | 9.81e-01 | 107.25(58.09)    | 4.34e-01 | 25.87(42.72)    | 7.36e-01 | 30.34(24.80)  | 3.38e-01 | 2.44 | 9.51e-01 | 0.00           |
| AC C14                   | 73.10(51.56)   | 3.24e-01 | -12.81(56.96)     | 9.81e-01 | 23.53(57.79)     | 9.46e-01 | 35.40(48.87)    | 7.02e-01 | 32.38(26.70)  | 3.38e-01 | 1.28 | 9.51e-01 | 0.00           |
| AC C16:1-OH/C14:1-DC     | 43.15(42.75)   | 4.70e-01 | -46.76(65.41)     | 7.51e-01 | 5.13(52.39)      | 9.59e-01 | 52.39(38.60)    | 4.74e-01 | 27.37(23.46)  | 3.55e-01 | 2.02 | 9.51e-01 | 0.00           |
| AC C5-DC                 | 6.40(67.29)    | 9.24e-01 | -167.53(80.39)    | 2.92e-01 | 10.53(67.93)     | 9.50e-01 | -38.61(59.84)   | 7.19e-01 | -37.88(33.87) | 3.74e-01 | 3.54 | 8.98e-01 | 0.00           |
| AC C18                   | 18.56(71.26)   | 8.50e-01 | -7.03(76.38)      | 9.81e-01 | 93.85(62.42)     | 5.97e-01 | 9.61(62.42)     | 9.29e-01 | 32.90(33.68)  | 4.55e-01 | 1.41 | 9.51e-01 | 0.00           |
| NEFA                     | 483.11(285.25) | 2.61e-01 | 107.99(286.86)    | 9.60e-01 | -78.61(263.97)   | 9.46e-01 | -151.07(277.51) | 7.72e-01 | 80.36(139.11) | 7.60e-01 | 3.06 | 8.98e-01 | 0.20           |
| AC C12                   | 72.07(57.88)   | 3.52e-01 | -44.03(51.34)     | 7.05e-01 | -21.53(58.22)    | 9.46e-01 | 51.28(45.99)    | 5.56e-01 | 15.49(27.84)  | 7.60e-01 | 3.31 | 8.98e-01 | 10.31          |
| AC C18:2                 | 21.06(59.42)   | 8.06e-01 | 2.01(70.71)       | 9.96e-01 | -12.76(69.93)    | 9.46e-01 | -61.95(54.93)   | 5.56e-01 | -16.46(31.33) | 7.60e-01 | 1.16 | 9.51e-01 | 0.00           |
| AC C18:1-DC              | 15.33(60.57)   | 8.50e-01 | -11.06(61.27)     | 9.81e-01 | -14.55(55.92)    | 9.46e-01 | -32.06(45.46)   | 7.02e-01 | -14.10(27.29) | 7.60e-01 | 0.39 | 9.82e-01 | 0.00           |
| AC C16:1                 | 99.41(53.75)   | 2.22e-01 | -28.25(49.64)     | 8.31e-01 | 47.11(56.41)     | 7.78e-01 | -44.70(47.14)   | 6.18e-01 | 14.50(33.79)  | 8.20e-01 | 5.14 | 8.98e-01 | 41.81          |
| AC C3                    | -49.35(56.46)  | 5.22e-01 | 72.11(63.26)      | 5.30e-01 | 3.68(59.72)      | 9.70e-01 | -47.99(52.24)   | 6.25e-01 | -11.58(28.74) | 8.25e-01 | 2.75 | 9.51e-01 | 0.00           |
| AC C14:1-OH              | NA             | NA       | 37.77(74.43)      | 8.70e-01 | NA               | NA       | 4.45(55.65)     | 9.72e-01 | 16.40(44.57)  | 8.37e-01 | 0.13 | 9.51e-01 | 0.00           |
| AC C14:1                 | 21.25(46.34)   | 7.67e-01 | -66.11(48.48)     | 3.90e-01 | -9.28(47.10)     | 9.46e-01 | 13.74(41.65)    | 8.60e-01 | -7.56(22.83)  | 8.51e-01 | 2.11 | 9.51e-01 | 0.00           |
| AC C20                   | NA             | NA       | -0.00(63.18)      | 1.00e+00 | 41.46(46.84)     | 7.53e-01 | -53.76(46.25)   | 5.56e-01 | -5.11(32.22)  | 9.69e-01 | 2.10 | 8.98e-01 | 16.67          |
| Lactate                  | 20.12(12.82)   | 2.99e-01 | -11.70(15.95)     | 7.51e-01 | -8.44(15.53)     | 9.46e-01 | -8.19(11.27)    | 7.02e-01 | -1.19(7.86)   | 9.69e-01 | 3.80 | 8.98e-01 | 24.77          |
| Asparagine/Aspartic acid | 0.67(3.74)     | 8.81e-01 | -1.95(2.96)       | 7.65e-01 | 0.87(2.93)       | 9.46e-01 | 1.06(2.87)      | 8.60e-01 | 0.13(1.54)    | 9.78e-01 | 0.69 | 9.52e-01 | 0.00           |
| Glycerol                 | -110.04(74.34) | 3.12e-01 | 136.19(81.49)     | 3.27e-01 | 17.21(77.14)     | 9.46e-01 | -13.36(73.14)   | 9.24e-01 | 3.79(49.45)   | 9.78e-01 | 5.07 | 8.98e-01 | 40.29          |
| AC C14:2                 | 68.18(48.29)   | 3.24e-01 | -105.50(58.86)    | 3.27e-01 | -19.01(47.04)    | 9.46e-01 | 42.96(45.25)    | 6.18e-01 | 2.18(35.55)   | 9.78e-01 | 6.20 | 8.98e-01 | 51.56          |
| Alanine                  | 0.37(0.29)     | 3.39e-01 | -0.43(0.28)       | 3.31e-01 | 0.03(0.25)       | 9.57e-01 | 0.01(0.23)      | 9.74e-01 | -0.01(0.14)   | 9.78e-01 | 4.07 | 8.98e-01 | 17.83          |
| AC C2                    | -35.87(61.02)  | 6.93e-01 | -10.72(75.09)     | 9.81e-01 | -24.23(67.61)    | 9.46e-01 | 34.24(43.87)    | 7.02e-01 | 0.81(29.06)   | 9.78e-01 | 1.10 | 9.51e-01 | 0.00           |

Both ancestry-specific and meta-analysis p-values represent the p-value after FDR adjustment

SUPPLEMENTARY DATA

**Supplementary Table 4.** Associations of Newborn Cord Metabolites with Sum of Skin Folds.

| Metabolite                                          | Afro-Caribbean  |          | Northern European |          | Mexican American |          | Thai            |          | Meta-Analysis   |          |       |          |                |
|-----------------------------------------------------|-----------------|----------|-------------------|----------|------------------|----------|-----------------|----------|-----------------|----------|-------|----------|----------------|
|                                                     | Beta(SE)        | P        | Beta(SE)          | P        | Beta(SE)         | P        | Beta(SE)        | P        | Beta(SE)        | P        | Q     | Q-test P | I <sup>2</sup> |
| <b>Newborn Cord Metabolites – Sum of Skin Folds</b> |                 |          |                   |          |                  |          |                 |          |                 |          |       |          |                |
| 3-Hydroxybutyrate                                   | 0.1701(0.0903)  | 2.51e-01 | 0.4307(0.1398)    | 1.19e-01 | 0.1454(0.1550)   | 8.36e-01 | 0.2611(0.1077)  | 2.84e-01 | 0.2369(0.0576)  | 2.09e-03 | 2.87  | 8.31e-01 | 0.02           |
| Serine                                              | 0.0133(0.0059)  | 1.88e-01 | 0.0126(0.0078)    | 6.47e-01 | 0.0110(0.0069)   | 6.99e-01 | 0.0125(0.0065)  | 4.73e-01 | 0.0124(0.0033)  | 5.34e-03 | 0.07  | 9.96e-01 | 0.00           |
| AC C4-OH                                            | 0.1992(0.1128)  | 2.51e-01 | 0.3173(0.1839)    | 6.47e-01 | 0.2002(0.2101)   | 8.36e-01 | 0.2631(0.1382)  | 4.73e-01 | 0.2366(0.0739)  | 2.12e-02 | 0.37  | 9.96e-01 | 0.00           |
| AC C10-OH/C8-DC                                     | 0.3586(0.1529)  | 1.66e-01 | 0.3605(0.2766)    | 6.82e-01 | 0.3522(0.2990)   | 7.33e-01 | 0.2800(0.2289)  | 7.99e-01 | 0.3406(0.1077)  | 2.12e-02 | 0.09  | 9.96e-01 | 0.00           |
| Proline                                             | 0.0085(0.0039)  | 1.96e-01 | 0.0027(0.0057)    | 8.49e-01 | 0.0052(0.0061)   | 8.36e-01 | 0.0091(0.0050)  | 4.73e-01 | 0.0070(0.0025)  | 4.41e-02 | 0.99  | 9.57e-01 | 0.00           |
| AC C8:1-DC                                          | 0.5139(0.2165)  | 1.66e-01 | 0.3805(0.3651)    | 7.31e-01 | 0.7178(0.4122)   | 6.99e-01 | 0.1050(0.2802)  | 9.36e-01 | 0.4083(0.1451)  | 4.41e-02 | 1.98  | 8.63e-01 | 0.00           |
| Triglycerides                                       | -0.0113(0.0070) | 2.51e-01 | -0.0207(0.0086)   | 4.37e-01 | -0.0195(0.0119)  | 6.99e-01 | -0.0566(0.0112) | 3.46e-05 | -0.0261(0.0098) | 5.83e-02 | 11.97 | 4.05e-01 | 76.80          |
| Ornithine                                           | 0.0082(0.0070)  | 4.75e-01 | 0.0155(0.0092)    | 6.47e-01 | 0.0194(0.0095)   | 5.47e-01 | 0.0018(0.0114)  | 9.36e-01 | 0.0114(0.0044)  | 6.99e-02 | 1.83  | 8.63e-01 | 0.00           |
| Glycine                                             | 0.0089(0.0029)  | 5.96e-02 | 0.0012(0.0041)    | 9.09e-01 | 0.0029(0.0034)   | 8.36e-01 | 0.0038(0.0034)  | 8.03e-01 | 0.0047(0.0019)  | 6.99e-02 | 3.14  | 8.31e-01 | 17.52          |
| AC C5:1                                             | 0.4456(0.2232)  | 2.38e-01 | 0.1949(0.3083)    | 8.49e-01 | 0.7761(0.3364)   | 5.47e-01 | 0.0249(0.2429)  | 9.36e-01 | 0.3282(0.1483)  | 1.33e-01 | 3.79  | 8.31e-01 | 17.53          |
| AC C20-OH/C18-DC                                    | -0.2296(0.2447) | 5.81e-01 | -0.3050(0.3751)   | 8.06e-01 | -0.3386(0.3592)  | 8.36e-01 | -1.1683(0.2952) | 2.43e-03 | -0.5179(0.2345) | 1.33e-01 | 6.81  | 8.31e-01 | 55.41          |
| AC C16                                              | 0.5221(0.2956)  | 2.51e-01 | 0.1732(0.4662)    | 8.95e-01 | 1.0468(0.5667)   | 6.81e-01 | -0.0390(0.5251) | 9.41e-01 | 0.4341(0.2095)  | 1.72e-01 | 2.38  | 8.39e-01 | 0.00           |
| AC C12-OH/C10-DC                                    | 0.2359(0.1434)  | 2.51e-01 | 0.1414(0.2563)    | 8.49e-01 | 0.1083(0.2271)   | 8.67e-01 | 0.1746(0.1802)  | 8.03e-01 | 0.1851(0.0936)  | 2.00e-01 | 0.27  | 9.96e-01 | 0.00           |
| AC C4/Ci4                                           | -0.6439(0.2633) | 1.66e-01 | -0.3054(0.3815)   | 8.06e-01 | -0.3324(0.4609)  | 8.56e-01 | 0.1584(0.3688)  | 9.36e-01 | -0.3337(0.1959) | 3.35e-01 | 3.16  | 8.31e-01 | 18.61          |
| AC C18:1-DC                                         | -0.2916(0.2425) | 4.69e-01 | -0.0016(0.3624)   | 9.96e-01 | -0.1211(0.4074)  | 9.30e-01 | -0.4363(0.2936) | 6.04e-01 | -0.2547(0.1538) | 3.35e-01 | 1.00  | 9.57e-01 | 0.00           |
| Phenylalanine                                       | -0.0011(0.0083) | 9.59e-01 | -0.0206(0.0121)   | 6.47e-01 | -0.0020(0.0121)  | 9.30e-01 | -0.0194(0.0116) | 4.79e-01 | -0.0090(0.0055) | 3.35e-01 | 2.94  | 8.31e-01 | 5.41           |
| AC C5-DC                                            | -0.2983(0.2738) | 5.20e-01 | -0.5270(0.4759)   | 7.31e-01 | -0.2277(0.5022)  | 8.67e-01 | -0.2092(0.3783) | 9.36e-01 | -0.3020(0.1866) | 3.35e-01 | 0.31  | 9.96e-01 | 0.00           |
| AC C14-OH/C12-DC                                    | NA              | NA       | 0.7505(0.4190)    | 6.47e-01 | NA               | NA       | 0.1794(0.3210)  | 9.36e-01 | 0.4015(0.2784)  | 4.30e-01 | 1.17  | 8.31e-01 | 14.58          |
| AC C8:1                                             | 0.4947(0.1761)  | 8.85e-02 | -0.0283(0.2939)   | 9.61e-01 | -0.1742(0.3303)  | 8.67e-01 | 0.1920(0.1863)  | 8.03e-01 | 0.2012(0.1449)  | 4.30e-01 | 4.56  | 8.31e-01 | 36.02          |
| AC C14                                              | 0.3955(0.2077)  | 2.51e-01 | -0.1708(0.3331)   | 8.49e-01 | 0.1784(0.4217)   | 8.74e-01 | 0.0962(0.3157)  | 9.36e-01 | 0.1993(0.1457)  | 4.30e-01 | 2.24  | 8.39e-01 | 1.02           |
| AC C6-DC/C8-OH                                      | 0.1063(0.1630)  | 6.90e-01 | 0.2774(0.2621)    | 7.31e-01 | 0.2172(0.2824)   | 8.56e-01 | 0.0819(0.2168)  | 9.36e-01 | 0.1454(0.1078)  | 4.30e-01 | 0.46  | 9.96e-01 | 0.00           |
| Leucine/Isoleucine                                  | 0.0003(0.0032)  | 9.59e-01 | 0.0019(0.0057)    | 9.09e-01 | 0.0060(0.0043)   | 6.99e-01 | 0.0048(0.0045)  | 8.03e-01 | 0.0028(0.0021)  | 4.30e-01 | 1.39  | 9.48e-01 | 0.00           |
| AC C16-OH/C14-DC                                    | 0.0601(0.1626)  | 8.80e-01 | 0.3586(0.3132)    | 7.31e-01 | 0.4243(0.3218)   | 6.99e-01 | 0.0850(0.2205)  | 9.36e-01 | 0.1505(0.1131)  | 4.30e-01 | 1.56  | 9.25e-01 | 0.00           |
| AC C10:2                                            | 0.4411(0.2121)  | 2.17e-01 | -0.2771(0.3171)   | 7.95e-01 | 0.4531(0.3329)   | 6.99e-01 | 0.0737(0.2227)  | 9.36e-01 | 0.1945(0.1563)  | 4.80e-01 | 4.45  | 8.31e-01 | 29.98          |
| AC C8:1-OH/C6:1-DC                                  | 0.3716(0.2290)  | 2.51e-01 | -0.2013(0.3267)   | 8.49e-01 | 0.2084(0.3990)   | 8.67e-01 | 0.1005(0.2684)  | 9.36e-01 | 0.1626(0.1434)  | 5.31e-01 | 2.14  | 8.39e-01 | 0.00           |
| AC C10:3                                            | 0.5216(0.1665)  | 5.96e-02 | 0.0377(0.2718)    | 9.61e-01 | 0.0895(0.3318)   | 9.30e-01 | -0.0339(0.1548) | 9.36e-01 | 0.1749(0.1563)  | 5.31e-01 | 6.46  | 8.31e-01 | 52.70          |
| AC C10:1                                            | 0.3683(0.2056)  | 2.51e-01 | -0.2823(0.3594)   | 8.06e-01 | 0.2419(0.4206)   | 8.65e-01 | 0.0492(0.2628)  | 9.36e-01 | 0.1613(0.1450)  | 5.31e-01 | 2.75  | 8.31e-01 | 5.52           |
| AC C5                                               | -0.2421(0.1666) | 3.26e-01 | 0.0629(0.2758)    | 9.16e-01 | -0.0605(0.2790)  | 9.30e-01 | -0.0315(0.2201) | 9.36e-01 | -0.1127(0.1100) | 5.66e-01 | 1.18  | 9.57e-01 | 0.00           |
| Valine                                              | -0.0000(0.0026) | 9.96e-01 | 0.0017(0.0047)    | 8.95e-01 | 0.0042(0.0035)   | 7.33e-01 | 0.0020(0.0034)  | 9.36e-01 | 0.0017(0.0017)  | 5.66e-01 | 0.94  | 9.57e-01 | 0.00           |
| AC C16:1-OH/C14:1-DC                                | 0.0131(0.1726)  | 9.59e-01 | -0.4913(0.3817)   | 6.82e-01 | 0.0298(0.3808)   | 9.56e-01 | -0.3244(0.2496) | 7.50e-01 | -0.1252(0.1256) | 5.66e-01 | 2.36  | 8.39e-01 | 0.00           |
| AC C18:1                                            | 0.2521(0.2358)  | 5.20e-01 | 0.2077(0.3830)    | 8.49e-01 | 1.0224(0.4733)   | 5.47e-01 | -0.3546(0.3525) | 8.03e-01 | 0.2220(0.2292)  | 5.66e-01 | 5.54  | 8.31e-01 | 42.74          |
| Methionine                                          | 0.0034(0.0197)  | 9.59e-01 | 0.0021(0.0303)    | 9.61e-01 | 0.0594(0.0288)   | 5.47e-01 | -0.0037(0.0255) | 9.36e-01 | 0.0120(0.0125)  | 5.66e-01 | 3.37  | 8.31e-01 | 0.06           |
| AC C18:2                                            | -0.0820(0.2394) | 8.80e-01 | -0.2031(0.4152)   | 8.49e-01 | 0.4454(0.5099)   | 8.36e-01 | -0.5887(0.3544) | 4.79e-01 | -0.1592(0.1689) | 5.66e-01 | 2.99  | 8.31e-01 | 0.00           |
| NEFA                                                | 0.7381(1.1233)  | 6.90e-01 | -0.9646(1.6971)   | 8.49e-01 | -0.4513(1.9235)  | 9.30e-01 | -3.7822(1.7384) | 4.07e-01 | -0.8817(1.0135) | 6.10e-01 | 4.82  | 8.31e-01 | 39.39          |
| Glutamine/Glutamic acid                             | 0.0003(0.0022)  | 9.59e-01 | -0.0019(0.0040)   | 8.49e-01 | 0.0037(0.0051)   | 8.56e-01 | 0.0046(0.0032)  | 6.04e-01 | 0.0013(0.0016)  | 6.12e-01 | 2.17  | 8.39e-01 | 0.00           |
| Asparagine/Aspartic acid                            | -0.0057(0.0151) | 8.80e-01 | -0.0281(0.0174)   | 6.47e-01 | 0.0256(0.0212)   | 7.33e-01 | -0.0147(0.0184) | 8.48e-01 | -0.0079(0.0096) | 6.12e-01 | 3.99  | 8.31e-01 | 14.00          |
| AC C8                                               | 0.1301(0.1975)  | 6.90e-01 | -0.3300(0.3073)   | 7.31e-01 | 0.5707(0.4248)   | 6.99e-01 | 0.2276(0.2763)  | 8.48e-01 | 0.1091(0.1350)  | 6.12e-01 | 3.42  | 8.31e-01 | 0.00           |
| Citrulline                                          | -0.0425(0.0322) | 3.99e-01 | 0.0388(0.0559)    | 8.49e-01 | 0.0097(0.0549)   | 9.30e-01 | -0.0085(0.0366) | 9.36e-01 | -0.0134(0.0206) | 7.09e-01 | 1.88  | 8.63e-01 | 0.00           |
| AC C3                                               | -0.3845(0.2272) | 2.51e-01 | 0.3435(0.3738)    | 7.75e-01 | 0.2741(0.4355)   | 8.56e-01 | -0.3471(0.3379) | 8.03e-01 | -0.1204(0.1935) | 7.09e-01 | 4.09  | 8.31e-01 | 28.27          |
| AC C2                                               | -0.2218(0.2460) | 5.86e-01 | -0.0945(0.4439)   | 9.16e-01 | -0.3192(0.4930)  | 8.56e-01 | 0.1334(0.2841)  | 9.36e-01 | -0.0999(0.1620) | 7.09e-01 | 1.12  | 9.57e-01 | 0.00           |
| Arginine                                            | 0.0012(0.0059)  | 9.59e-01 | 0.0008(0.0085)    | 9.61e-01 | 0.0055(0.0090)   | 8.56e-01 | 0.0031(0.0076)  | 9.36e-01 | 0.0023(0.0037)  | 7.09e-01 | 0.21  | 9.96e-01 | 0.00           |
| AC C14:1                                            | 0.0611(0.1852)  | 8.80e-01 | -0.3749(0.2790)   | 6.82e-01 | 0.1607(0.3437)   | 8.67e-01 | -0.1891(0.2676) | 9.26e-01 | -0.0670(0.1246) | 7.60e-01 | 2.34  | 8.39e-01 | 0.00           |

SUPPLEMENTARY DATA

| Metabolite                                                                 | Afro-Caribbean  |          | Northern European |          | Mexican American |          | Thai            |          | Meta-Analysis   |          |       |          |                |
|----------------------------------------------------------------------------|-----------------|----------|-------------------|----------|------------------|----------|-----------------|----------|-----------------|----------|-------|----------|----------------|
|                                                                            | Beta(SE)        | P        | Beta(SE)          | P        | Beta(SE)         | P        | Beta(SE)        | P        | Beta(SE)        | P        | Q     | Q-test P | I <sup>2</sup> |
| AC C18-OH/C16-DC                                                           | 0.3084(0.3144)  | 5.75e-01 | 0.6378(0.4588)    | 6.82e-01 | 0.4123(0.4457)   | 8.36e-01 | -0.6443(0.3656) | 4.73e-01 | 0.1477(0.2865)  | 7.61e-01 | 6.43  | 8.31e-01 | 53.59          |
| Alanine                                                                    | 0.0019(0.0012)  | 2.51e-01 | -0.0024(0.0017)   | 6.82e-01 | 0.0019(0.0018)   | 8.36e-01 | -0.0003(0.0015) | 9.36e-01 | 0.0004(0.0010)  | 8.73e-01 | 5.47  | 8.31e-01 | 44.89          |
| AC C18                                                                     | 0.1832(0.2869)  | 6.90e-01 | -0.3013(0.4486)   | 8.49e-01 | 0.6221(0.4558)   | 6.99e-01 | -0.4309(0.4051) | 8.03e-01 | 0.0335(0.2052)  | 9.94e-01 | 3.81  | 8.31e-01 | 12.78          |
| Tyrosine                                                                   | -0.0007(0.0079) | 9.59e-01 | -0.0030(0.0117)   | 9.16e-01 | 0.0073(0.0119)   | 8.56e-01 | 0.0012(0.0116)  | 9.36e-01 | 0.0007(0.0051)  | 9.94e-01 | 0.44  | 9.96e-01 | 0.00           |
| AC C12:1                                                                   | 0.2967(0.1844)  | 2.51e-01 | -0.0872(0.3037)   | 9.09e-01 | -0.1411(0.3914)  | 9.12e-01 | -0.2148(0.2432) | 8.15e-01 | 0.0209(0.1538)  | 9.94e-01 | 3.42  | 8.31e-01 | 27.50          |
| Glycerol                                                                   | -0.1899(0.3003) | 6.90e-01 | 0.4635(0.4831)    | 7.75e-01 | -0.0716(0.5638)  | 9.35e-01 | -0.0682(0.4743) | 9.36e-01 | -0.0282(0.2087) | 9.94e-01 | 1.34  | 9.48e-01 | 0.00           |
| Lactate                                                                    | 0.0845(0.0518)  | 2.51e-01 | -0.1658(0.0936)   | 6.47e-01 | 0.0272(0.1126)   | 9.30e-01 | -0.0213(0.0729) | 9.36e-01 | -0.0055(0.0548) | 9.94e-01 | 5.79  | 8.31e-01 | 48.60          |
| AC C16:1                                                                   | 0.2008(0.2160)  | 5.81e-01 | -0.1833(0.2879)   | 8.49e-01 | 0.5739(0.4102)   | 6.99e-01 | -0.5392(0.3016) | 4.73e-01 | -0.0152(0.2140) | 9.94e-01 | 6.42  | 8.31e-01 | 52.87          |
| AC C20                                                                     | NA              | NA       | 0.4435(0.3712)    | 7.31e-01 | -0.0008(0.3355)  | 9.98e-01 | -0.2757(0.3003) | 8.08e-01 | 0.0107(0.2026)  | 9.94e-01 | 2.27  | 8.31e-01 | 10.15          |
| AC C12                                                                     | 0.1582(0.2305)  | 6.90e-01 | -0.4048(0.2985)   | 6.82e-01 | 0.0660(0.4250)   | 9.30e-01 | 0.1211(0.2969)  | 9.36e-01 | 0.0037(0.1460)  | 9.94e-01 | 2.50  | 8.39e-01 | 0.00           |
| AC C14:1-OH                                                                | NA              | NA       | 0.4166(0.4408)    | 7.75e-01 | NA               | NA       | -0.3401(0.3576) | 8.03e-01 | -0.0056(0.3758) | 9.94e-01 | 1.78  | 8.31e-01 | 43.73          |
| AC C14:2                                                                   | 0.1524(0.1921)  | 6.62e-01 | -0.4378(0.3427)   | 6.82e-01 | -0.2093(0.3441)  | 8.56e-01 | 0.1218(0.2929)  | 9.36e-01 | 0.0010(0.1340)  | 9.94e-01 | 2.80  | 8.31e-01 | 0.00           |
| <b>Newborn Cord Metabolites Adjusted for C-Peptide – Sum of Skin Folds</b> |                 |          |                   |          |                  |          |                 |          |                 |          |       |          |                |
| Serine                                                                     | 0.0176(0.0058)  | 3.52e-02 | 0.0173(0.0076)    | 4.24e-01 | 0.0141(0.0069)   | 4.06e-01 | 0.0160(0.0065)  | 1.90e-01 | 0.0164(0.0033)  | 4.18e-05 | 0.17  | 9.82e-01 | 0.00           |
| 3-Hydroxybutyrate                                                          | 0.2352(0.0885)  | 6.96e-02 | 0.5487(0.1373)    | 4.15e-03 | 0.1613(0.1540)   | 7.81e-01 | 0.2984(0.1069)  | 9.91e-02 | 0.3023(0.0687)  | 2.95e-04 | 4.63  | 7.25e-01 | 27.90          |
| AC C4-OH                                                                   | 0.2537(0.1100)  | 9.75e-02 | 0.4244(0.1804)    | 4.24e-01 | 0.2151(0.2087)   | 7.81e-01 | 0.2699(0.1369)  | 5.05e-01 | 0.2812(0.0726)  | 1.93e-03 | 0.80  | 9.82e-01 | 0.00           |
| Glycine                                                                    | 0.0107(0.0028)  | 9.64e-03 | 0.0024(0.0040)    | 9.07e-01 | 0.0041(0.0035)   | 7.53e-01 | 0.0061(0.0035)  | 5.05e-01 | 0.0064(0.0020)  | 1.78e-02 | 3.67  | 7.96e-01 | 28.01          |
| AC C10-OH/C8-DC                                                            | 0.3410(0.1493)  | 9.75e-02 | 0.4344(0.2701)    | 5.58e-01 | 0.2494(0.2994)   | 7.88e-01 | 0.2918(0.2265)  | 6.70e-01 | 0.3331(0.1059)  | 1.78e-02 | 0.25  | 9.82e-01 | 0.00           |
| Ornithine                                                                  | 0.0081(0.0068)  | 4.19e-01 | 0.0188(0.0090)    | 4.54e-01 | 0.0242(0.0096)   | 4.06e-01 | 0.0044(0.0113)  | 8.94e-01 | 0.0134(0.0044)  | 1.94e-02 | 2.87  | 8.25e-01 | 0.00           |
| Proline                                                                    | 0.0079(0.0038)  | 1.37e-01 | 0.0039(0.0056)    | 9.07e-01 | 0.0049(0.0061)   | 7.88e-01 | 0.0091(0.0049)  | 5.05e-01 | 0.0070(0.0024)  | 3.28e-02 | 0.68  | 9.82e-01 | 0.00           |
| AC C16                                                                     | 0.5135(0.2878)  | 2.02e-01 | 0.4272(0.4583)    | 8.26e-01 | 1.1233(0.5633)   | 4.06e-01 | -0.0019(0.5203) | 9.97e-01 | 0.4969(0.2055)  | 9.43e-02 | 2.18  | 9.33e-01 | 0.00           |
| AC C8:1-DC                                                                 | 0.4361(0.2119)  | 1.37e-01 | 0.2632(0.3579)    | 9.07e-01 | 0.6402(0.4095)   | 6.86e-01 | 0.1022(0.2774)  | 8.94e-01 | 0.3449(0.1428)  | 9.43e-02 | 1.52  | 9.41e-01 | 0.00           |
| AC C12-OH/C10-DC                                                           | 0.2407(0.1398)  | 2.19e-01 | 0.2766(0.2517)    | 7.73e-01 | 0.0501(0.2269)   | 9.54e-01 | 0.2054(0.1787)  | 7.36e-01 | 0.2047(0.0922)  | 1.43e-01 | 0.61  | 9.82e-01 | 0.00           |
| AC C20-OH/C18-DC                                                           | -0.2572(0.2370) | 4.51e-01 | -0.1754(0.3676)   | 9.50e-01 | -0.3370(0.3568)  | 7.88e-01 | -1.0898(0.2956) | 7.01e-03 | -0.4753(0.2183) | 1.45e-01 | 5.98  | 7.07e-01 | 50.11          |
| Leucine/Isoleucine                                                         | 0.0009(0.0032)  | 8.40e-01 | 0.0067(0.0057)    | 7.59e-01 | 0.0071(0.0043)   | 6.86e-01 | 0.0068(0.0045)  | 5.05e-01 | 0.0044(0.0021)  | 1.47e-01 | 2.09  | 9.35e-01 | 0.00           |
| AC C14                                                                     | 0.4713(0.2025)  | 9.75e-02 | 0.0476(0.3291)    | 9.88e-01 | 0.1975(0.4190)   | 8.64e-01 | 0.1619(0.3134)  | 8.94e-01 | 0.2972(0.1421)  | 1.47e-01 | 1.56  | 9.41e-01 | 0.00           |
| Triglycerides                                                              | -0.0049(0.0070) | 6.31e-01 | -0.0172(0.0084)   | 4.54e-01 | -0.0157(0.0119)  | 7.06e-01 | -0.0552(0.0111) | 5.18e-05 | -0.0224(0.0108) | 1.47e-01 | 14.88 | 1.04e-01 | 81.32          |
| AC C5:1                                                                    | 0.3534(0.2188)  | 2.39e-01 | 0.0562(0.3023)    | 9.88e-01 | 0.7340(0.3349)   | 4.06e-01 | 0.0501(0.2412)  | 9.40e-01 | 0.2659(0.1314)  | 1.55e-01 | 3.39  | 7.98e-01 | 0.01           |
| AC C5-DC                                                                   | -0.3148(0.2663) | 4.19e-01 | -0.6740(0.4655)   | 5.72e-01 | -0.2234(0.4996)  | 8.64e-01 | -0.3072(0.3774) | 8.94e-01 | -0.3564(0.1834) | 1.75e-01 | 0.58  | 9.82e-01 | 0.00           |
| Phenylalanine                                                              | -0.0046(0.0082) | 6.98e-01 | -0.0189(0.0119)   | 5.58e-01 | 0.0002(0.0120)   | 9.89e-01 | -0.0197(0.0115) | 5.05e-01 | -0.0096(0.0052) | 2.13e-01 | 2.42  | 8.93e-01 | 0.00           |
| AC C4/Ci4                                                                  | -0.7117(0.2561) | 5.84e-02 | -0.3557(0.3724)   | 8.26e-01 | -0.3376(0.4578)  | 7.88e-01 | 0.1693(0.3652)  | 8.94e-01 | -0.3601(0.2105) | 2.62e-01 | 3.94  | 7.61e-01 | 30.71          |
| AC C16-OH/C14-DC                                                           | 0.1122(0.1588)  | 6.31e-01 | 0.4594(0.3060)    | 5.72e-01 | 0.3610(0.3200)   | 7.53e-01 | 0.0898(0.2183)  | 8.94e-01 | 0.1820(0.1110)  | 2.87e-01 | 1.51  | 9.41e-01 | 0.00           |
| Glutamine/Glutamic acid                                                    | 0.0017(0.0022)  | 6.31e-01 | -0.0006(0.0039)   | 9.88e-01 | 0.0058(0.0052)   | 7.53e-01 | 0.0050(0.0031)  | 5.05e-01 | 0.0025(0.0016)  | 2.90e-01 | 1.81  | 9.41e-01 | 0.00           |
| AC C5                                                                      | -0.3188(0.1626) | 1.62e-01 | 0.0288(0.2694)    | 9.88e-01 | -0.0799(0.2772)  | 9.25e-01 | -0.0701(0.2183) | 8.94e-01 | -0.1655(0.1081) | 3.23e-01 | 1.69  | 9.41e-01 | 0.00           |
| AC C18:1                                                                   | 0.3351(0.2299)  | 2.86e-01 | 0.4448(0.3770)    | 7.59e-01 | 1.0111(0.4702)   | 4.06e-01 | -0.2810(0.3502) | 8.94e-01 | 0.3189(0.2176)  | 3.51e-01 | 5.21  | 7.07e-01 | 38.59          |
| AC C18:1-DC                                                                | -0.1708(0.2377) | 6.31e-01 | -0.0043(0.3538)   | 9.90e-01 | -0.1668(0.4053)  | 8.64e-01 | -0.4401(0.2907) | 5.05e-01 | -0.2128(0.1514) | 3.76e-01 | 1.00  | 9.82e-01 | 0.00           |
| AC C6-DC/C8-OH                                                             | 0.0978(0.1587)  | 6.69e-01 | 0.2738(0.2559)    | 7.73e-01 | 0.1963(0.2807)   | 7.88e-01 | 0.0768(0.2147)  | 8.94e-01 | 0.1368(0.1058)  | 4.19e-01 | 0.47  | 9.82e-01 | 0.00           |
| Methionine                                                                 | 0.0079(0.0192)  | 7.88e-01 | 0.0016(0.0296)    | 9.90e-01 | 0.0590(0.0287)   | 4.06e-01 | 0.0041(0.0254)  | 9.57e-01 | 0.0154(0.0123)  | 4.19e-01 | 2.88  | 8.25e-01 | 0.45           |
| AC C8:1                                                                    | 0.5157(0.1712)  | 3.52e-02 | -0.0589(0.2870)   | 9.88e-01 | -0.1401(0.3286)  | 8.64e-01 | 0.1582(0.1850)  | 8.94e-01 | 0.1897(0.1534)  | 4.19e-01 | 5.21  | 7.07e-01 | 44.10          |
| AC C14-OH/C12-DC                                                           | NA              | NA       | 0.7487(0.4096)    | 5.58e-01 | NA               | NA       | 0.1205(0.3180)  | 8.94e-01 | 0.3816(0.3096)  | 4.19e-01 | 1.47  | 7.61e-01 | 31.87          |
| Valine                                                                     | 0.0001(0.0026)  | 9.69e-01 | 0.0017(0.0046)    | 9.88e-01 | 0.0052(0.0035)   | 6.91e-01 | 0.0024(0.0034)  | 8.94e-01 | 0.0020(0.0016)  | 4.19e-01 | 1.43  | 9.41e-01 | 0.00           |
| AC C10:1                                                                   | 0.4844(0.2008)  | 9.75e-02 | -0.2081(0.3514)   | 9.07e-01 | 0.2177(0.4180)   | 8.64e-01 | 0.0596(0.2602)  | 9.40e-01 | 0.2010(0.1670)  | 4.19e-01 | 3.59  | 7.96e-01 | 26.44          |
| AC C8                                                                      | 0.2167(0.1929)  | 4.45e-01 | -0.2541(0.3006)   | 8.28e-01 | 0.5540(0.4221)   | 7.06e-01 | 0.2154(0.2737)  | 8.94e-01 | 0.1581(0.1326)  | 4.19e-01 | 2.90  | 8.25e-01 | 0.00           |
| AC C10:3                                                                   | 0.5298(0.1619)  | 2.96e-02 | 0.0413(0.2653)    | 9.88e-01 | 0.1264(0.3299)   | 8.69e-01 | -0.0466(0.1534) | 8.94e-01 | 0.1798(0.1592)  | 4.51e-01 | 7.14  | 7.07e-01 | 55.83          |
| AC C12                                                                     | 0.3307(0.2269)  | 2.86e-01 | -0.1790(0.2966)   | 9.07e-01 | 0.0511(0.4222)   | 9.71e-01 | 0.1987(0.2950)  | 8.94e-01 | 0.1453(0.1445)  | 5.31e-01 | 1.95  | 9.41e-01 | 0.00           |
| AC C10:2                                                                   | 0.4887(0.2063)  | 9.75e-02 | -0.3033(0.3094)   | 8.26e-01 | 0.3760(0.3328)   | 7.53e-01 | 0.0317(0.2214)  | 9.57e-01 | 0.1714(0.1747)  | 5.34e-01 | 5.46  | 7.07e-01 | 44.86          |

SUPPLEMENTARY DATA

| Metabolite               | Afro-Caribbean  |          | Northern European |          | Mexican American |          | Thai            |          | Meta-Analysis   |          |      |          |                |
|--------------------------|-----------------|----------|-------------------|----------|------------------|----------|-----------------|----------|-----------------|----------|------|----------|----------------|
|                          | Beta(SE)        | P        | Beta(SE)          | P        | Beta(SE)         | P        | Beta(SE)        | P        | Beta(SE)        | P        | Q    | Q-test P | I <sup>2</sup> |
| AC C14:2                 | 0.3055(0.1896)  | 2.39e-01 | -0.1628(0.3412)   | 9.50e-01 | -0.2062(0.3418)  | 8.62e-01 | 0.1593(0.2903)  | 8.94e-01 | 0.1249(0.1343)  | 5.60e-01 | 2.57 | 8.92e-01 | 1.69           |
| Arginine                 | 0.0036(0.0057)  | 6.69e-01 | -0.0013(0.0083)   | 9.88e-01 | 0.0040(0.0090)   | 8.64e-01 | 0.0057(0.0076)  | 8.94e-01 | 0.0032(0.0037)  | 5.89e-01 | 0.41 | 9.82e-01 | 0.00           |
| AC C8:1-OH/C6:1-DC       | 0.3293(0.2233)  | 2.86e-01 | -0.2706(0.3192)   | 8.28e-01 | 0.1100(0.3985)   | 9.25e-01 | 0.0946(0.2657)  | 8.94e-01 | 0.1189(0.1409)  | 5.99e-01 | 2.39 | 8.93e-01 | 0.00           |
| Tyrosine                 | 0.0023(0.0078)  | 8.40e-01 | 0.0027(0.0114)    | 9.88e-01 | 0.0088(0.0118)   | 7.88e-01 | 0.0042(0.0115)  | 8.94e-01 | 0.0039(0.0051)  | 6.37e-01 | 0.23 | 9.82e-01 | 0.00           |
| AC C3                    | -0.4213(0.2211) | 1.72e-01 | 0.2554(0.3657)    | 9.07e-01 | 0.3054(0.4327)   | 7.88e-01 | -0.3215(0.3348) | 8.68e-01 | -0.1432(0.1902) | 6.41e-01 | 4.04 | 7.61e-01 | 28.23          |
| AC C12:1                 | 0.4332(0.1808)  | 9.75e-02 | 0.1203(0.3000)    | 9.88e-01 | -0.1839(0.3892)  | 8.64e-01 | -0.1555(0.2418) | 8.94e-01 | 0.1140(0.1705)  | 6.97e-01 | 4.78 | 7.25e-01 | 40.78          |
| AC C16:1-OH/C14:1-DC     | 0.0353(0.1681)  | 8.68e-01 | -0.2026(0.3790)   | 9.42e-01 | -0.0152(0.3784)  | 9.87e-01 | -0.2955(0.2475) | 7.36e-01 | -0.0775(0.1234) | 7.15e-01 | 1.36 | 9.41e-01 | 0.00           |
| AC C16:1                 | 0.2997(0.2112)  | 2.96e-01 | 0.0653(0.2868)    | 9.88e-01 | 0.6435(0.4080)   | 6.86e-01 | -0.4319(0.3017) | 5.51e-01 | 0.1199(0.1993)  | 7.21e-01 | 5.75 | 7.07e-01 | 46.71          |
| AC C14:1                 | 0.1796(0.1818)  | 5.01e-01 | -0.0985(0.2806)   | 9.88e-01 | 0.1562(0.3414)   | 8.64e-01 | -0.1004(0.2670) | 8.94e-01 | 0.0628(0.1235)  | 7.52e-01 | 1.19 | 9.71e-01 | 0.00           |
| AC C2                    | -0.1762(0.2397) | 6.31e-01 | -0.0206(0.4338)   | 9.90e-01 | -0.3652(0.4899)  | 7.88e-01 | 0.1216(0.2814)  | 8.94e-01 | -0.0800(0.1591) | 7.52e-01 | 1.03 | 9.82e-01 | 0.00           |
| AC C18-OH/C16-DC         | 0.2547(0.3053)  | 6.07e-01 | 0.7795(0.4482)    | 5.58e-01 | 0.3507(0.4441)   | 7.88e-01 | -0.6605(0.3619) | 5.05e-01 | 0.1496(0.3011)  | 7.52e-01 | 7.28 | 7.07e-01 | 59.30          |
| Lactate                  | 0.1132(0.0506)  | 1.02e-01 | -0.1245(0.0920)   | 6.37e-01 | 0.0811(0.1125)   | 7.88e-01 | -0.0073(0.0724) | 9.74e-01 | 0.0258(0.0541)  | 7.52e-01 | 5.83 | 7.07e-01 | 48.64          |
| Citrulline               | -0.0338(0.0314) | 4.51e-01 | 0.0351(0.0546)    | 9.07e-01 | 0.0048(0.0546)   | 9.71e-01 | -0.0022(0.0363) | 9.87e-01 | -0.0092(0.0202) | 7.52e-01 | 1.37 | 9.41e-01 | 0.00           |
| AC C18:2                 | -0.0134(0.2335) | 9.69e-01 | 0.0120(0.4084)    | 9.90e-01 | 0.4739(0.5065)   | 7.88e-01 | -0.5404(0.3516) | 5.05e-01 | -0.0743(0.1659) | 7.52e-01 | 3.04 | 8.25e-01 | 0.00           |
| Asparagine/Aspartic acid | -0.0034(0.0147) | 8.68e-01 | -0.0250(0.0171)   | 5.72e-01 | 0.0296(0.0211)   | 7.04e-01 | -0.0077(0.0184) | 8.94e-01 | -0.0041(0.0096) | 7.55e-01 | 4.08 | 7.61e-01 | 16.38          |
| AC C18                   | 0.1275(0.2798)  | 7.70e-01 | -0.0793(0.4411)   | 9.88e-01 | 0.6367(0.4527)   | 7.04e-01 | -0.4436(0.4012) | 7.36e-01 | 0.0541(0.1857)  | 8.49e-01 | 3.35 | 7.98e-01 | 0.00           |
| AC C20                   | NA              | NA       | 0.5760(0.3632)    | 5.58e-01 | -0.0421(0.3334)  | 9.71e-01 | -0.3268(0.2974) | 7.36e-01 | 0.0375(0.2601)  | 9.39e-01 | 3.73 | 7.07e-01 | 46.29          |
| Alanine                  | 0.0019(0.0011)  | 2.39e-01 | -0.0029(0.0016)   | 5.58e-01 | 0.0018(0.0018)   | 7.81e-01 | -0.0005(0.0015) | 8.94e-01 | 0.0002(0.0011)  | 9.39e-01 | 6.82 | 7.07e-01 | 55.84          |
| AC C14:1-OH              | NA              | NA       | 0.4597(0.4304)    | 7.73e-01 | NA               | NA       | -0.2923(0.3549) | 8.94e-01 | 0.0443(0.3739)  | 9.41e-01 | 1.82 | 7.25e-01 | 44.96          |
| Glycerol                 | -0.1017(0.2932) | 8.26e-01 | 0.4089(0.4720)    | 8.28e-01 | -0.0976(0.5602)  | 9.71e-01 | 0.0139(0.4708)  | 9.95e-01 | 0.0170(0.2049)  | 9.52e-01 | 0.90 | 9.82e-01 | 0.00           |
| NEFA                     | 2.0350(1.1202)  | 1.99e-01 | -0.1843(1.6697)   | 9.88e-01 | -0.1601(1.9150)  | 9.71e-01 | -2.8014(1.7719) | 5.05e-01 | 0.0008(1.0851)  | 9.99e-01 | 5.60 | 7.07e-01 | 46.89          |

Both ancestry-specific and meta-analysis p-values represent the p-value after FDR adjustment
